# Supplementary material
Source: publisher figshare collection journal article supplement (https://frontiersin.figshare.com/ndownloader/files/22383738)

# Supplemental Figure 1. Regional plot

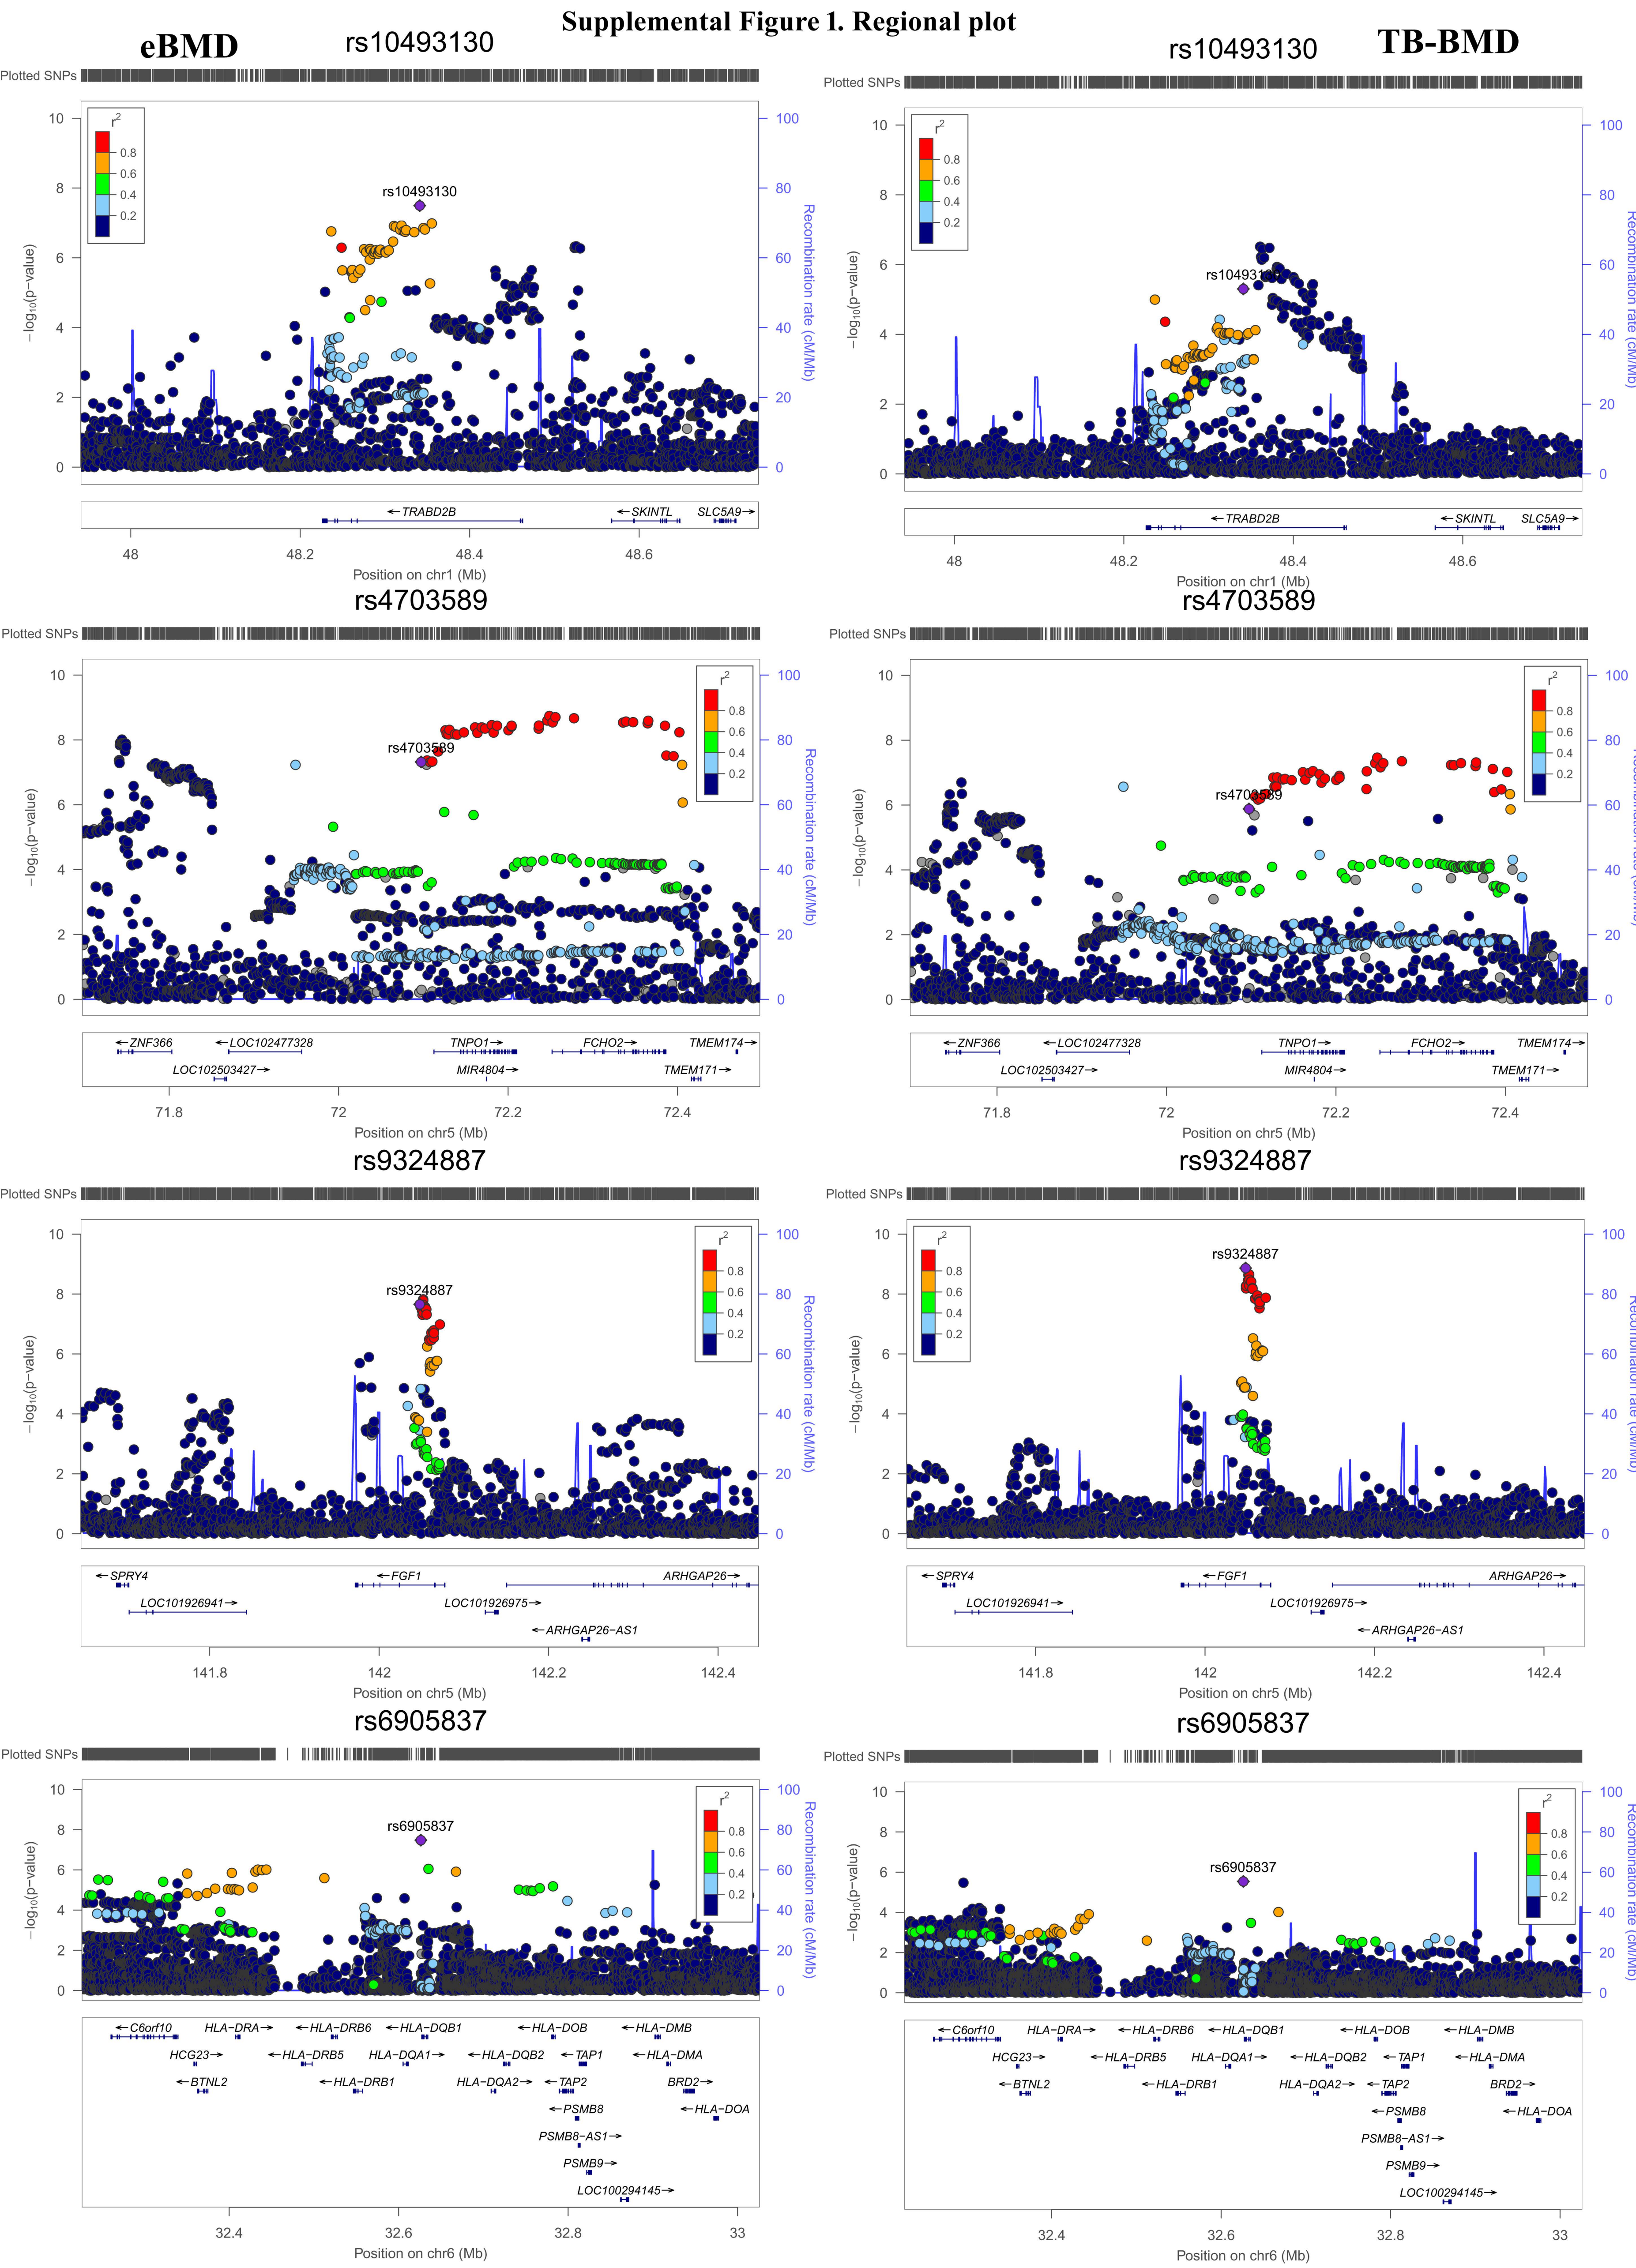



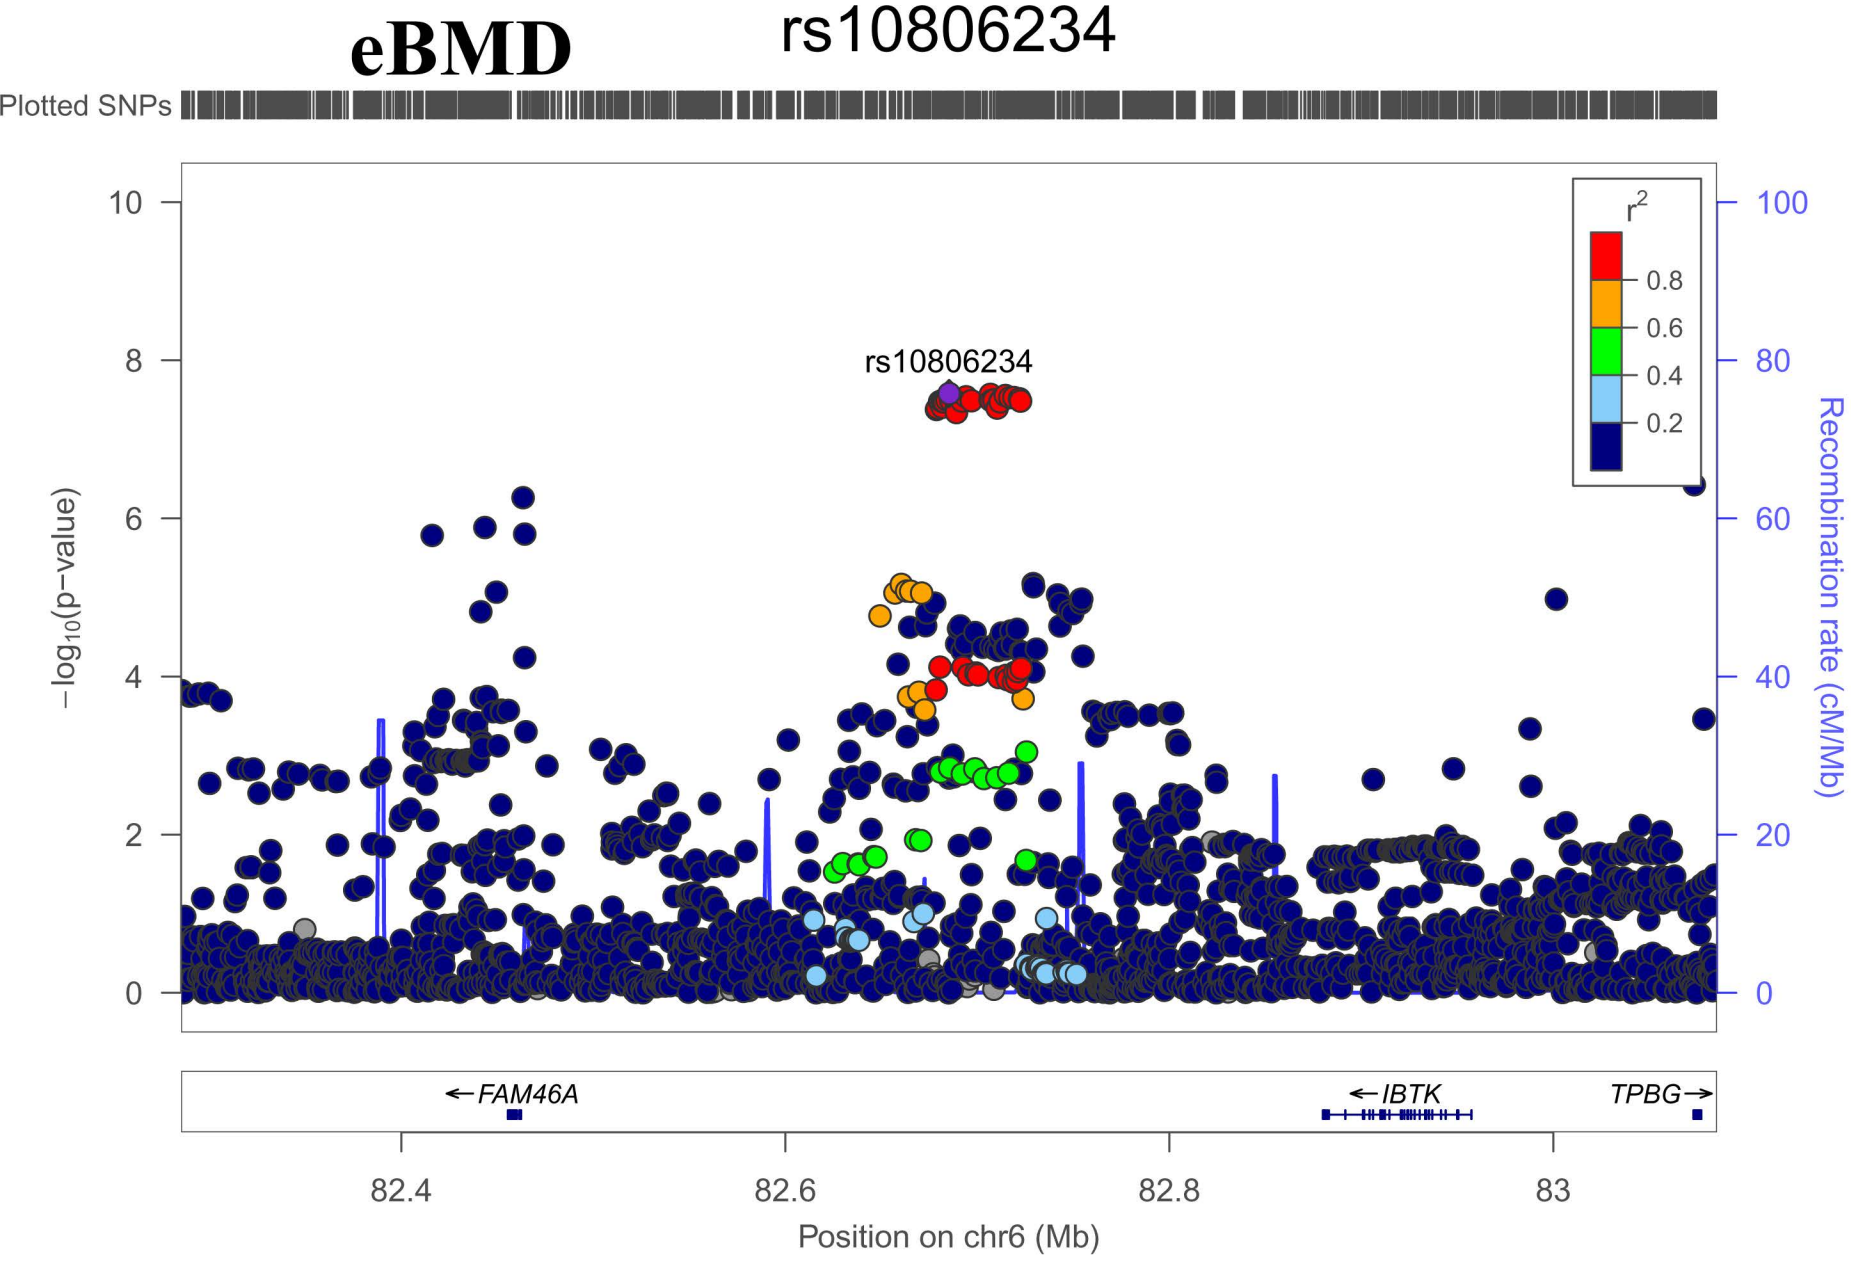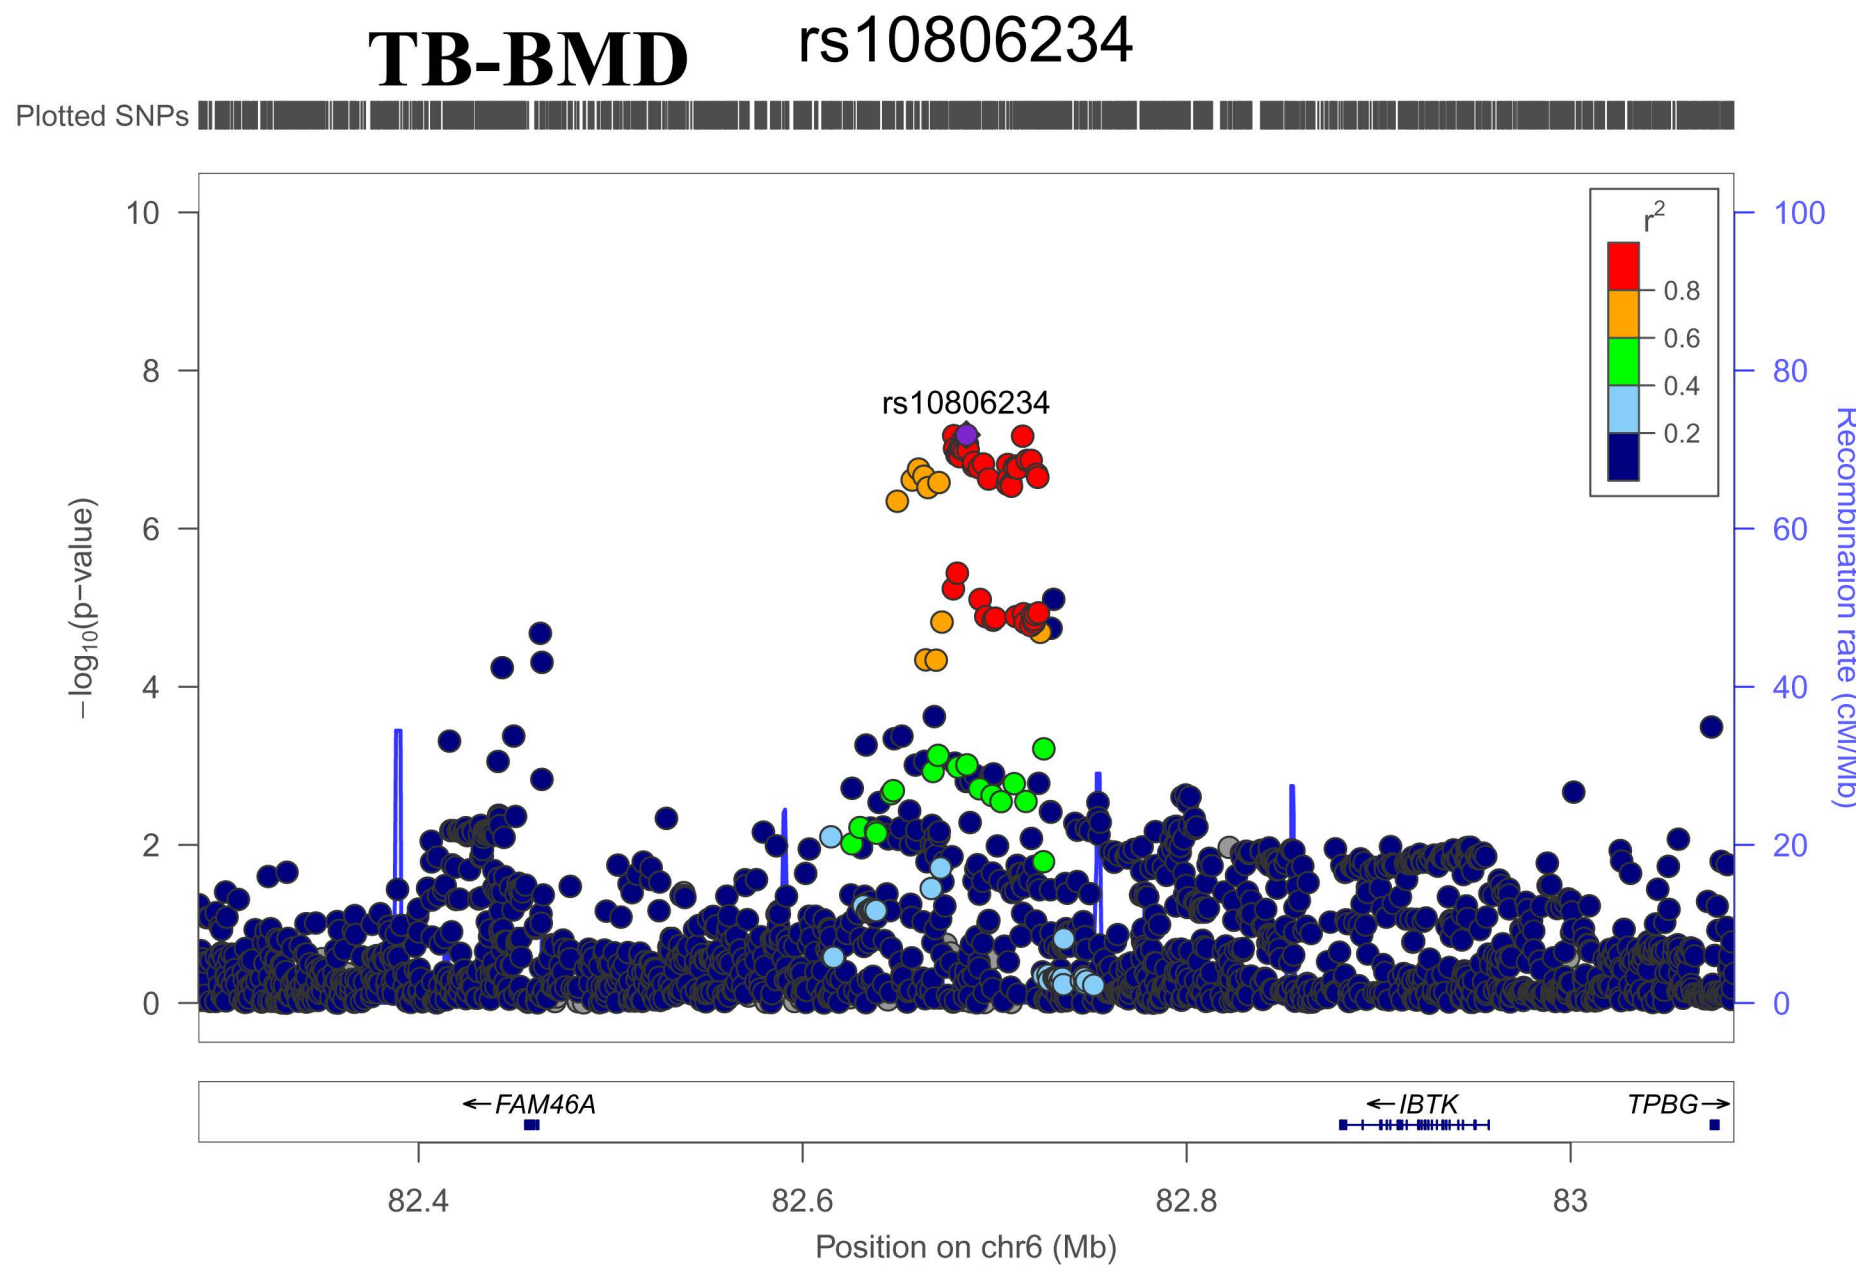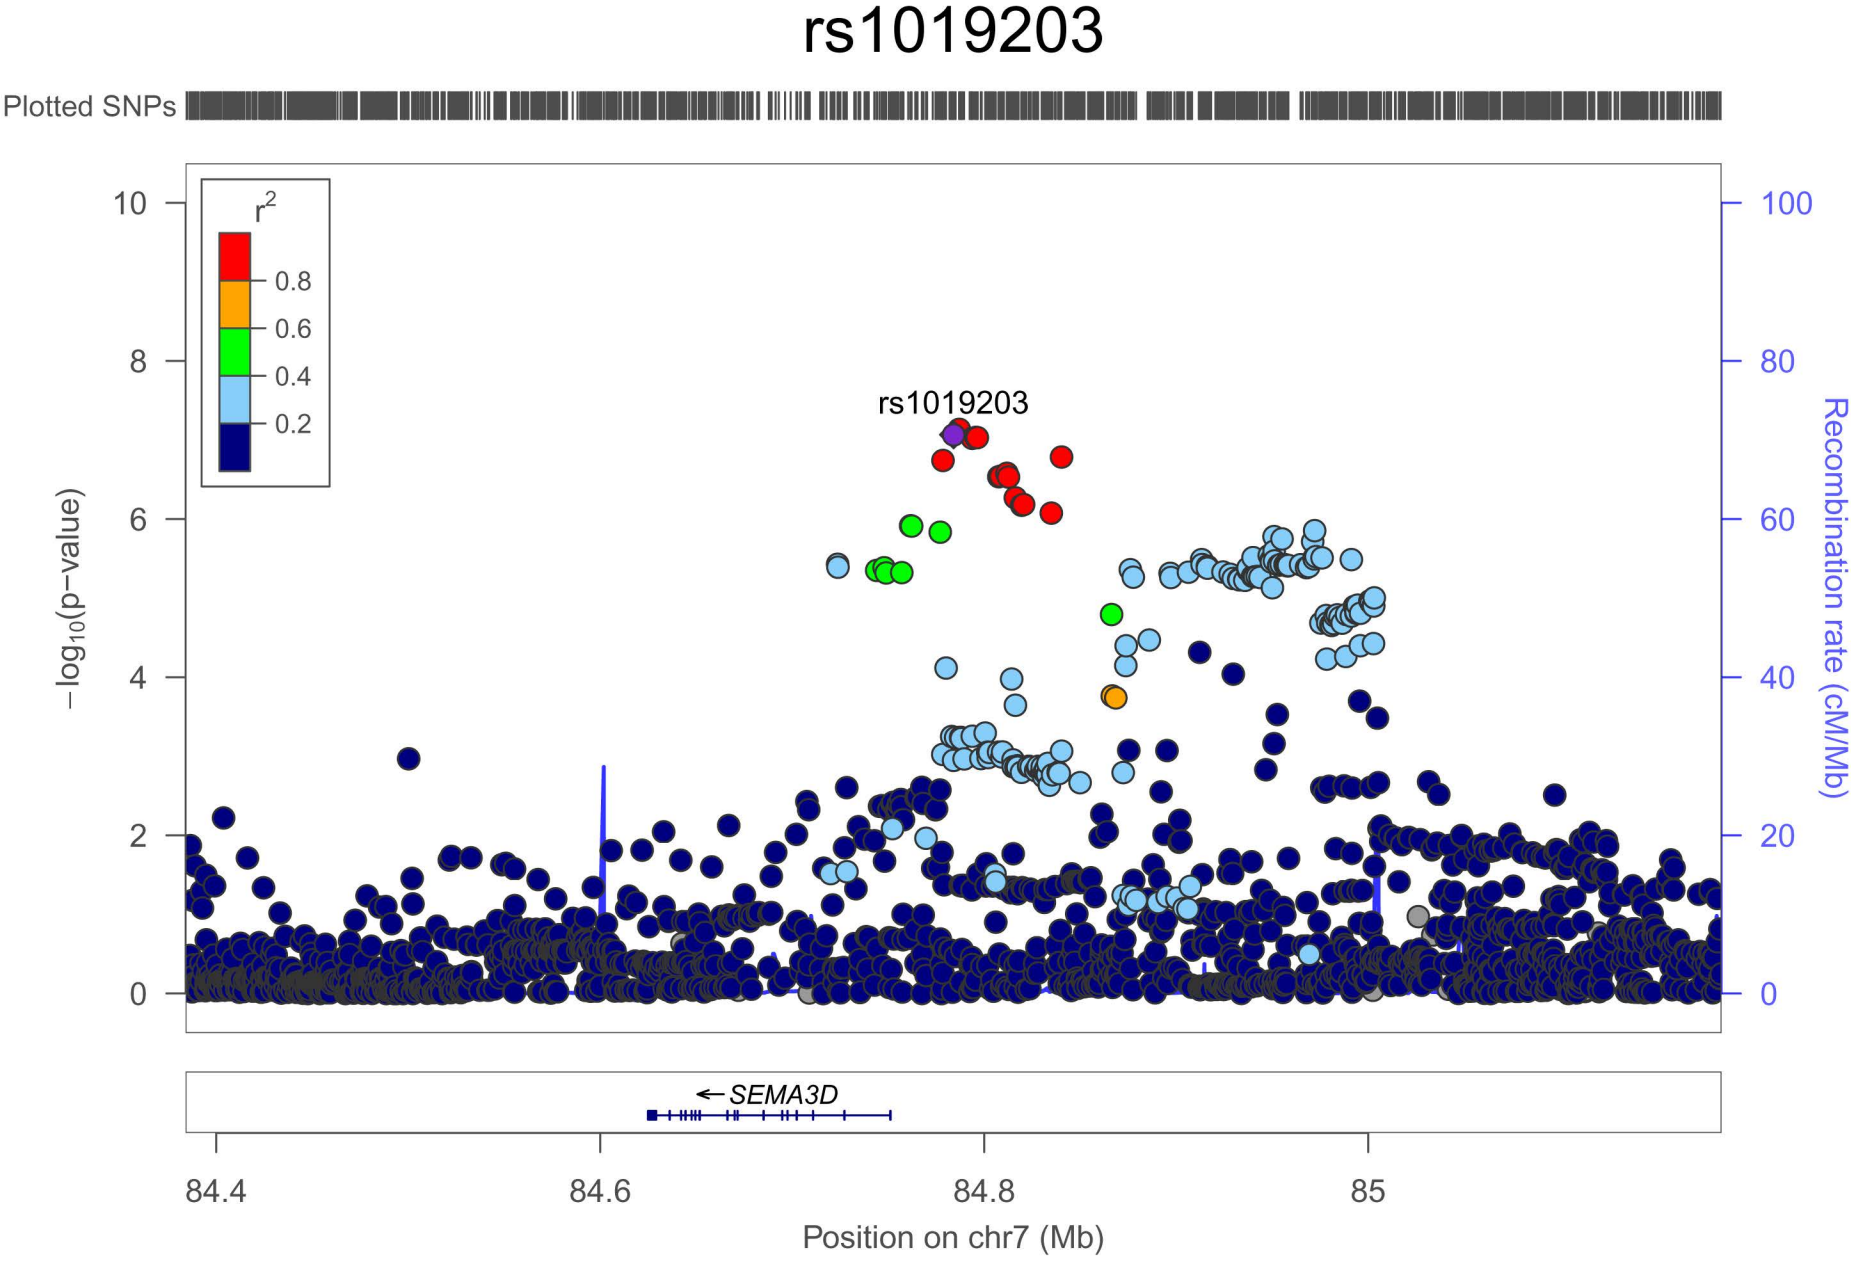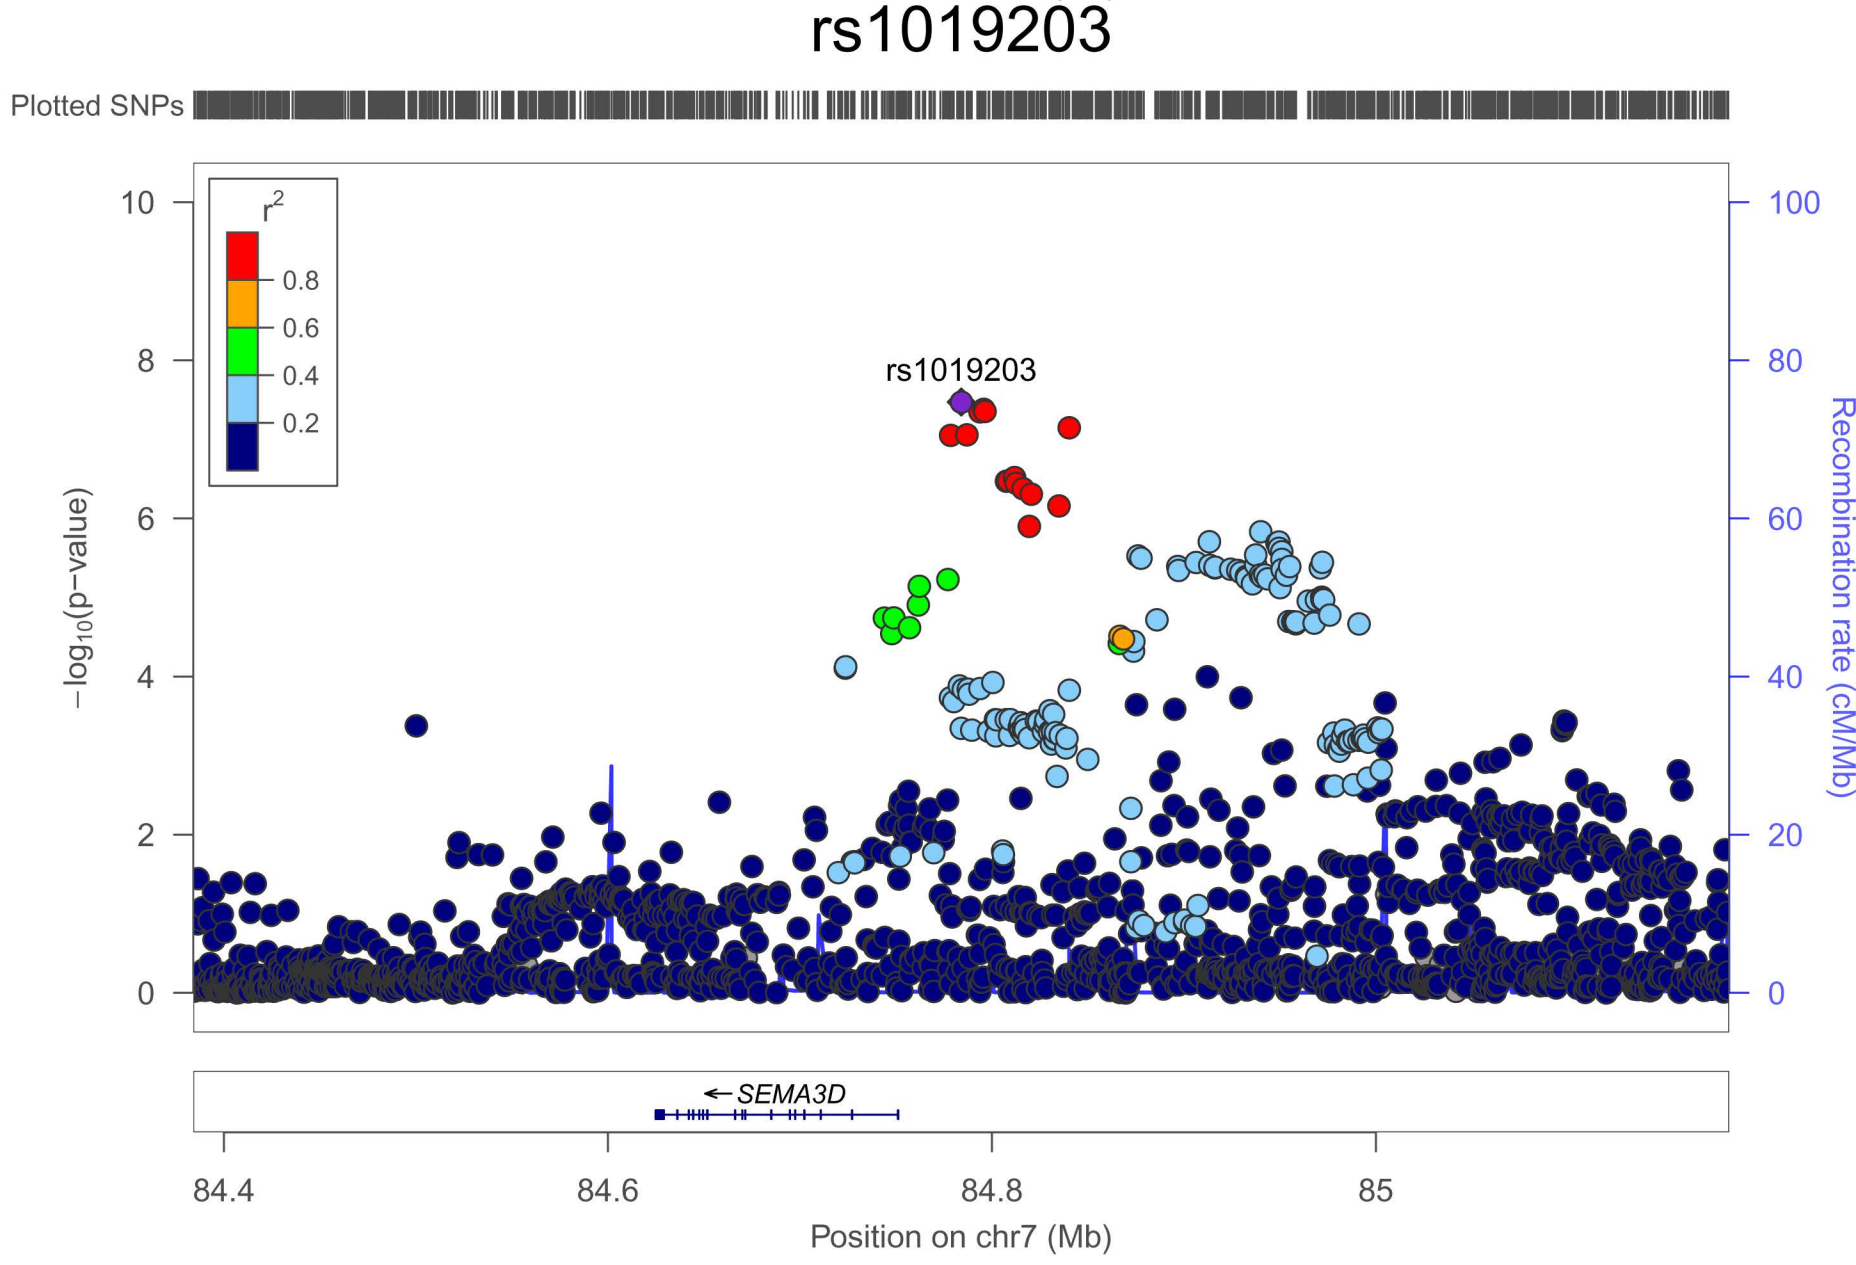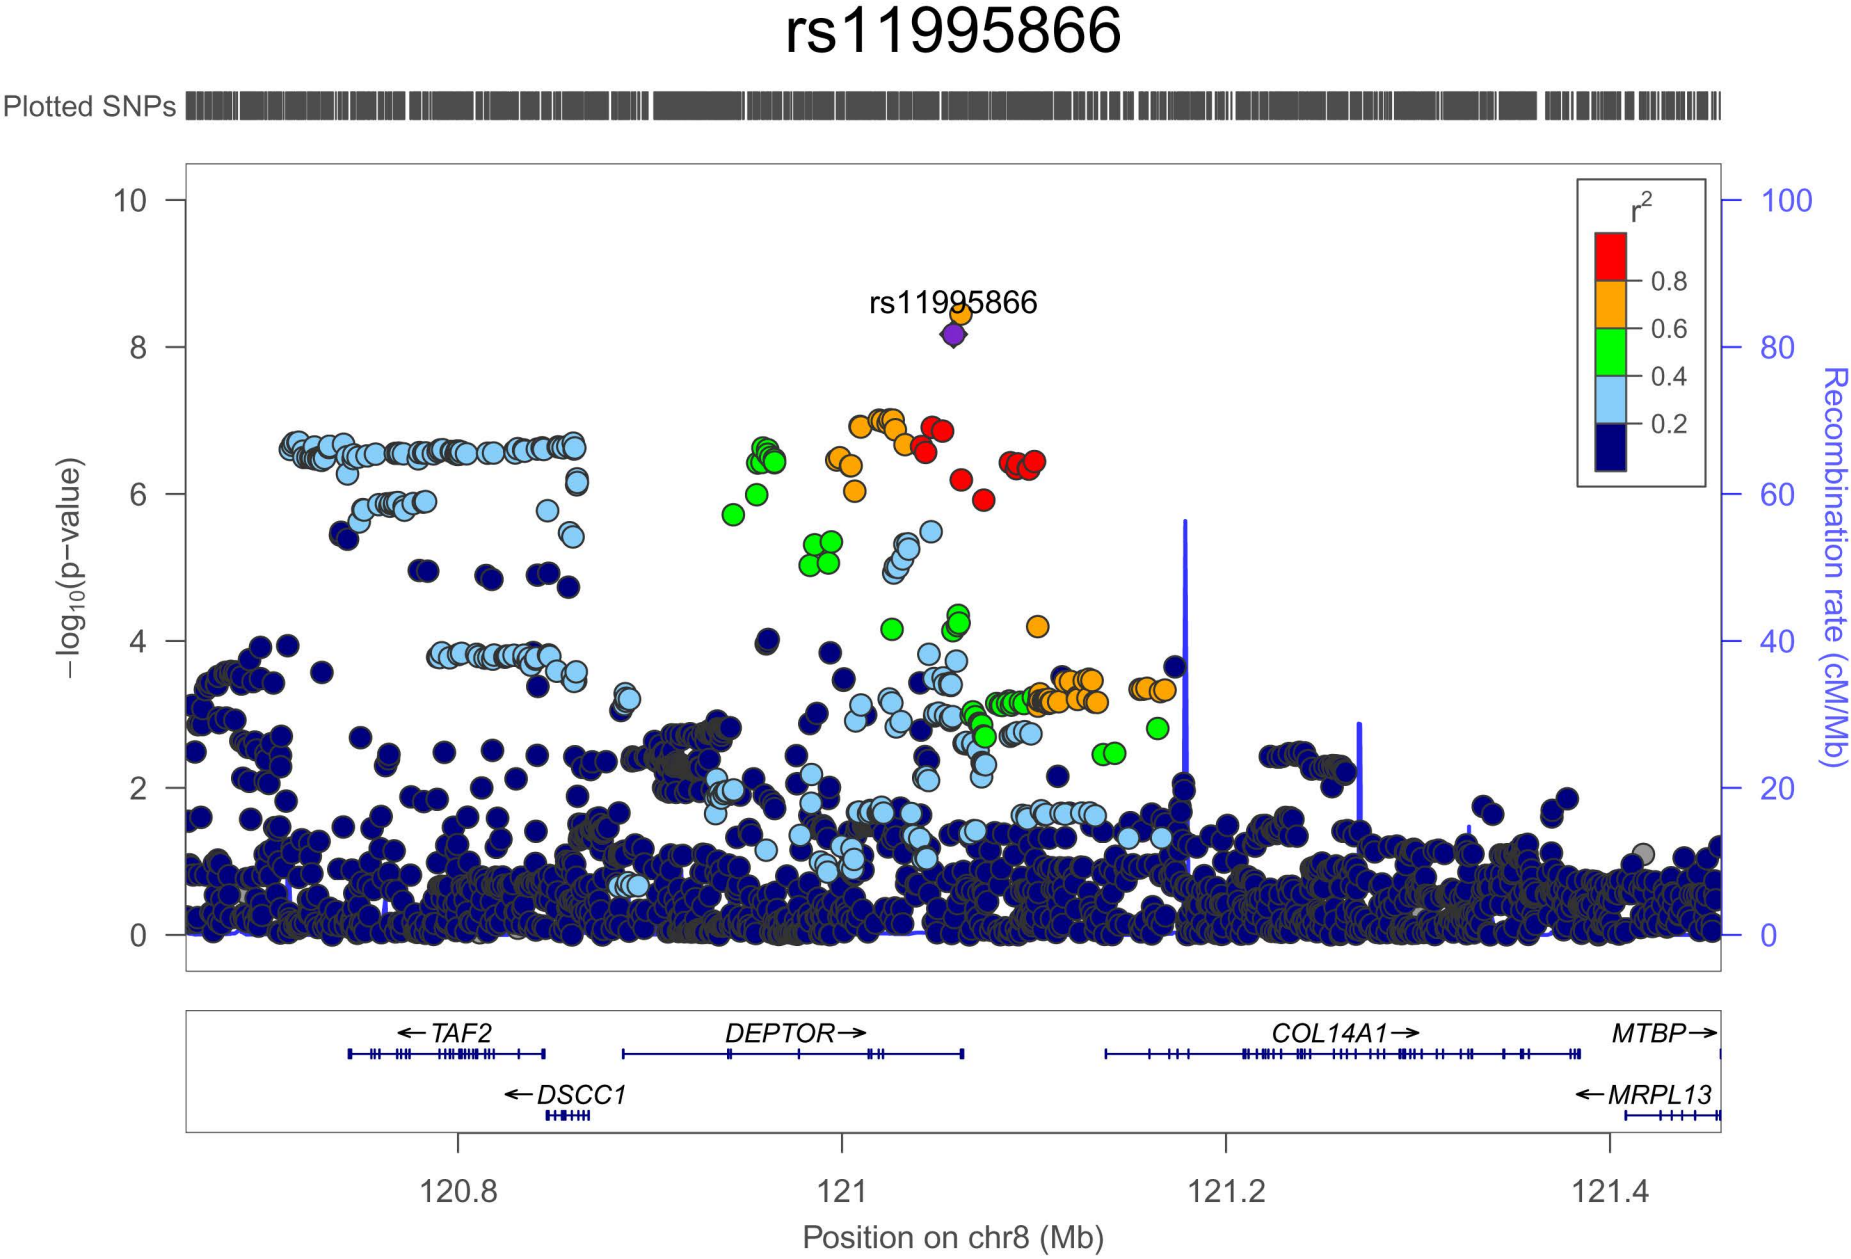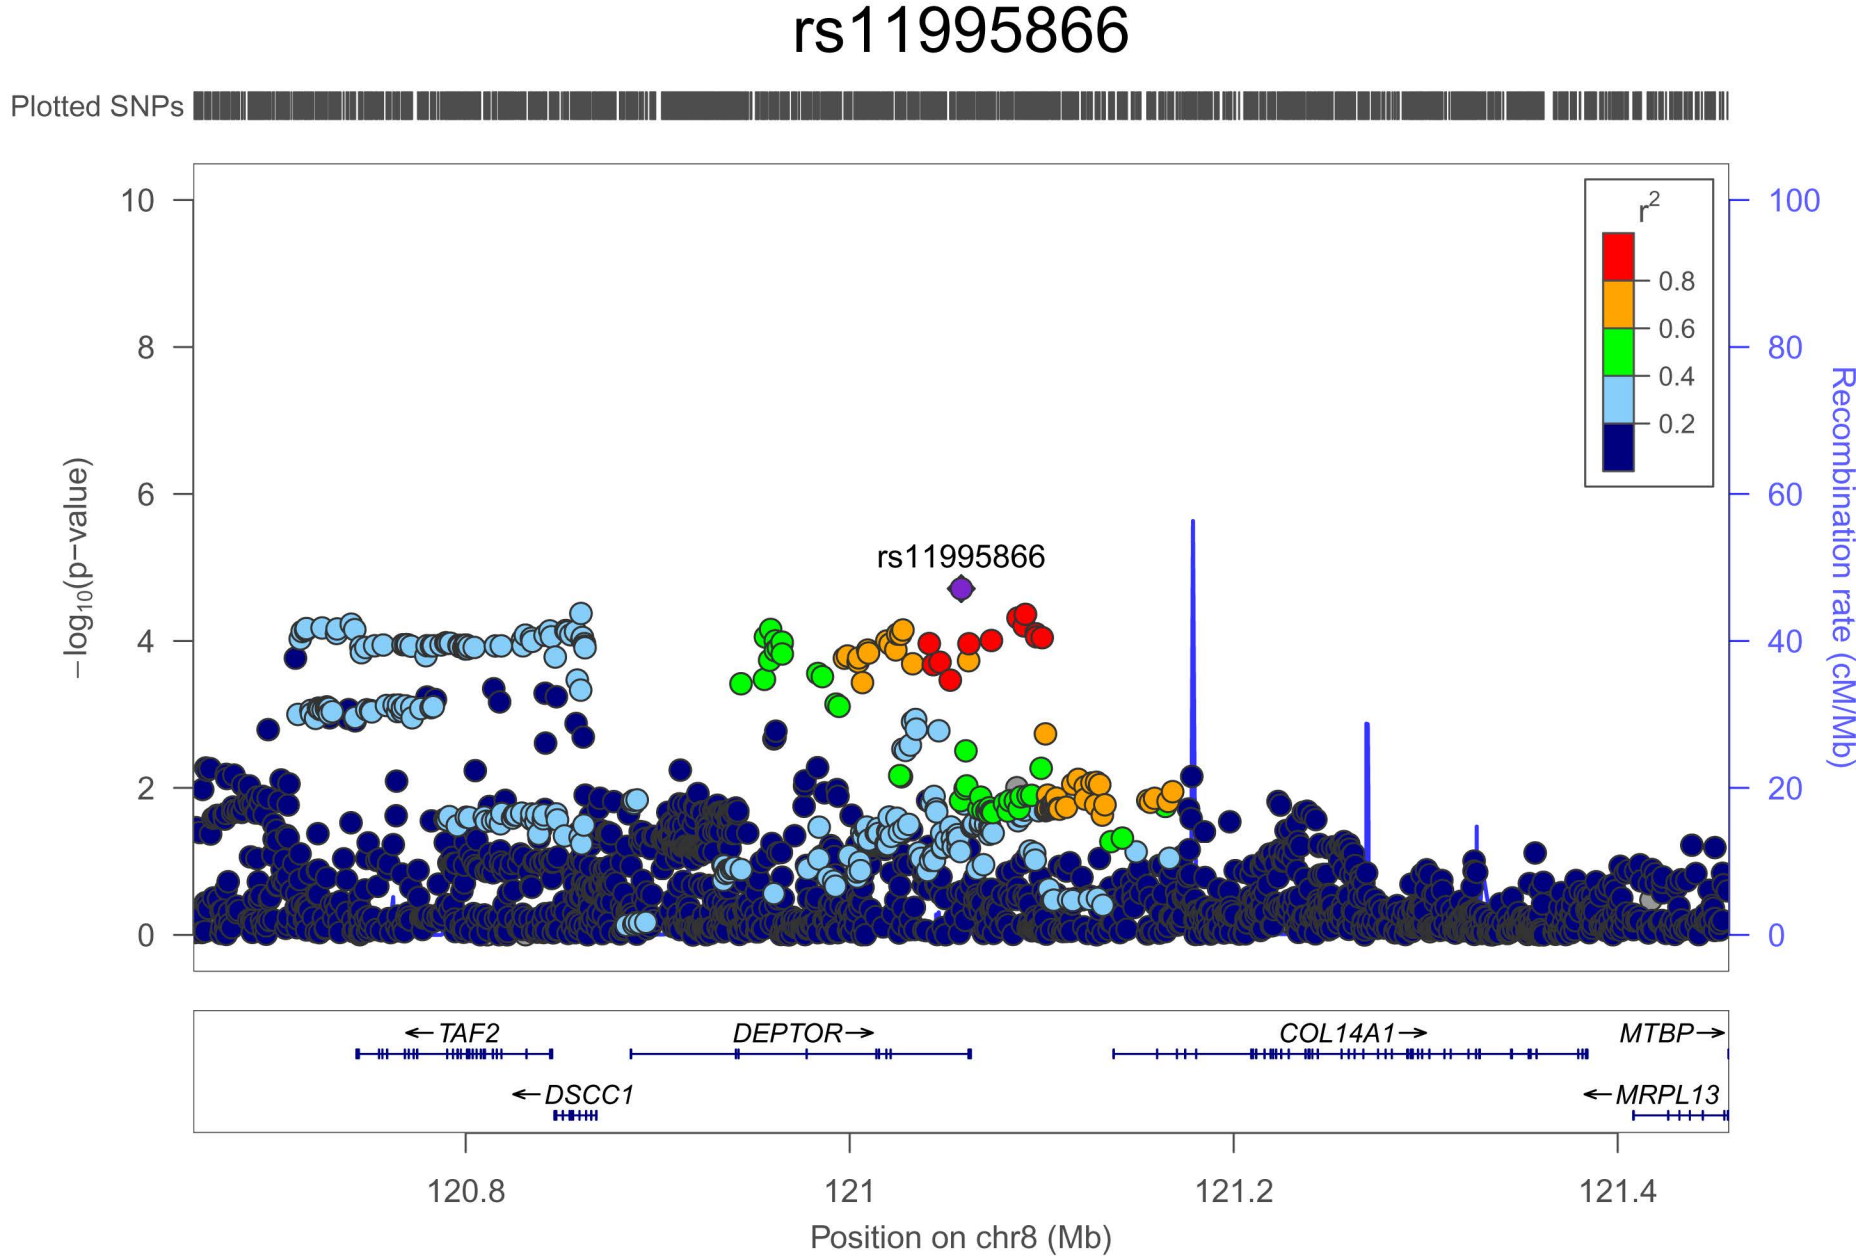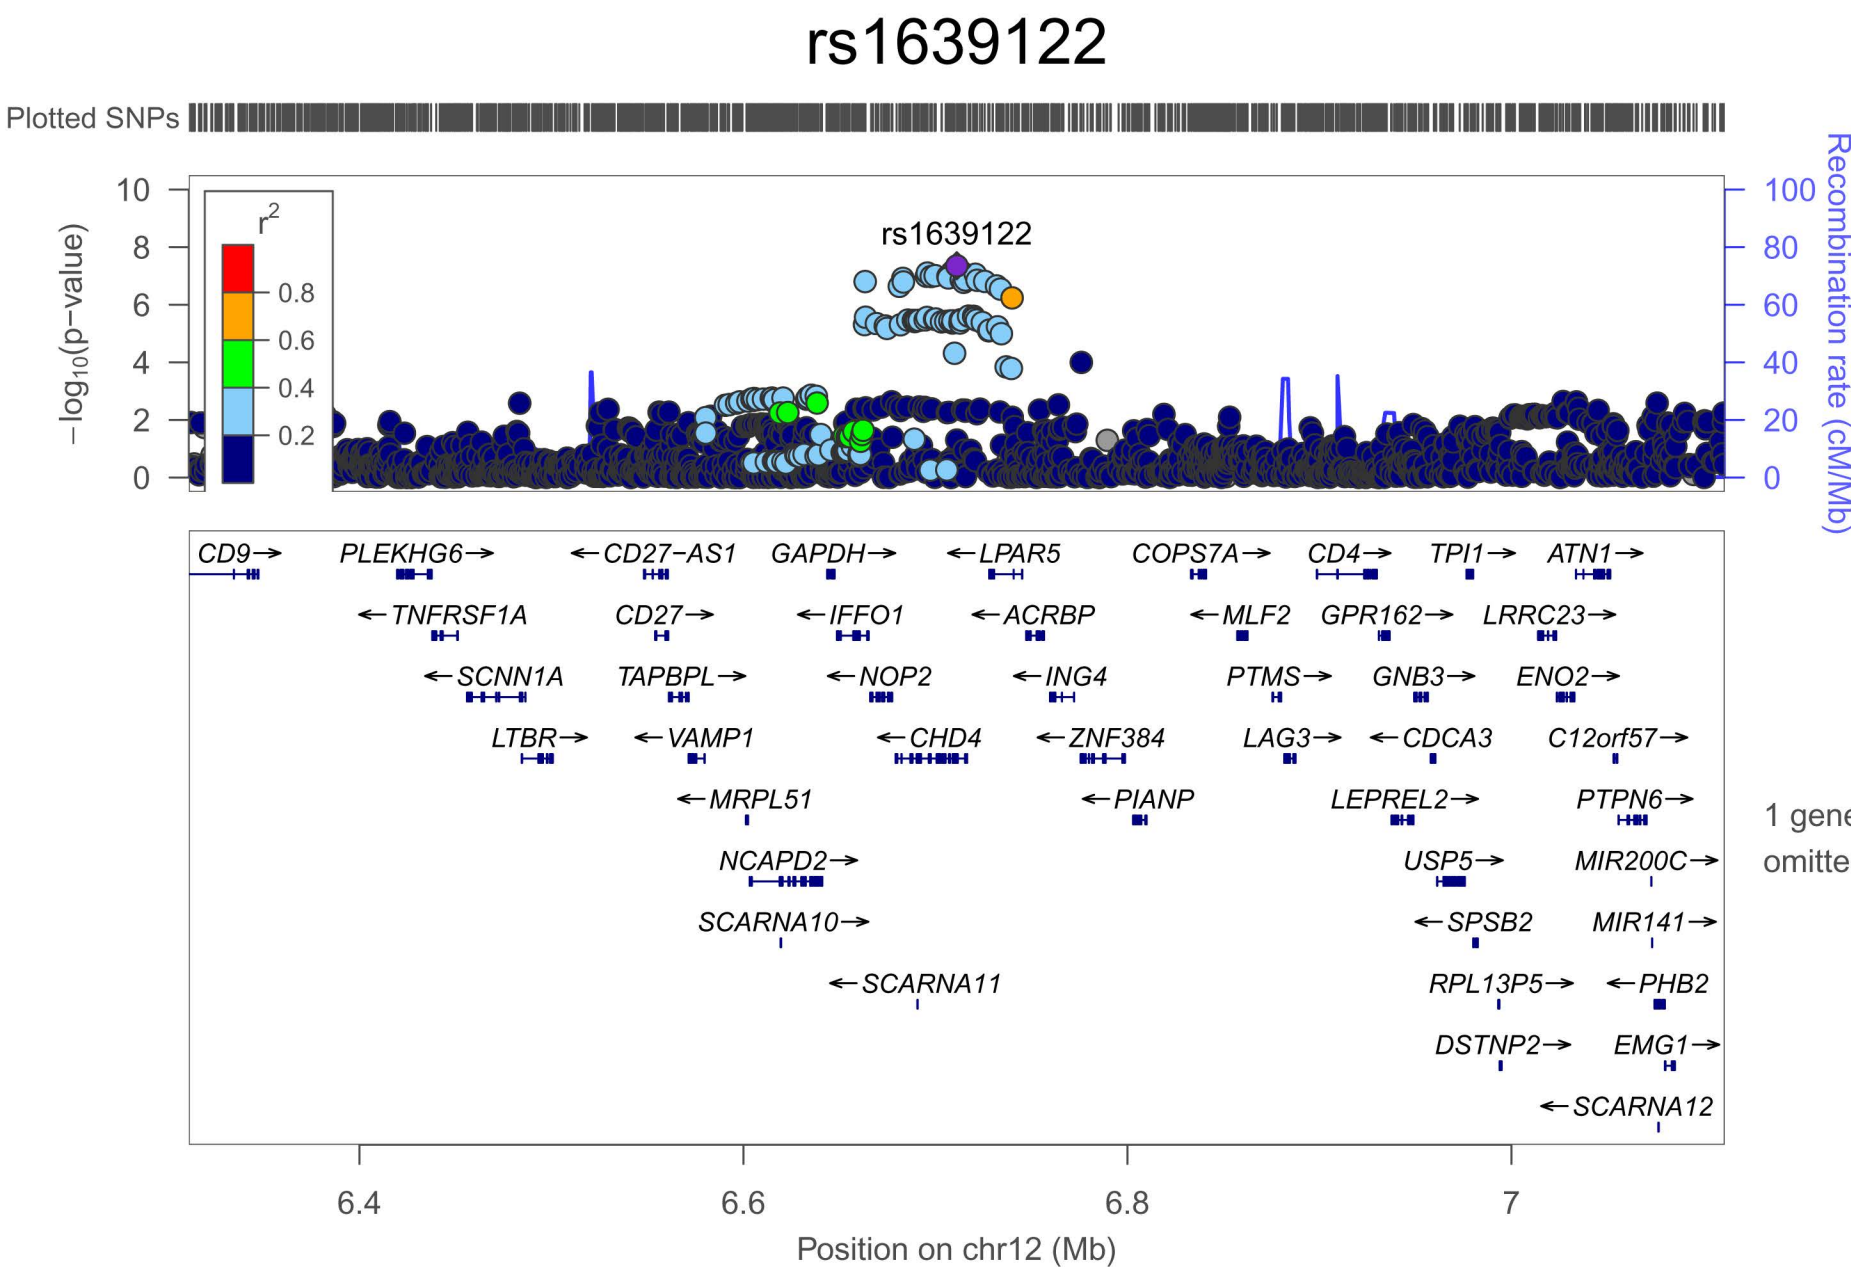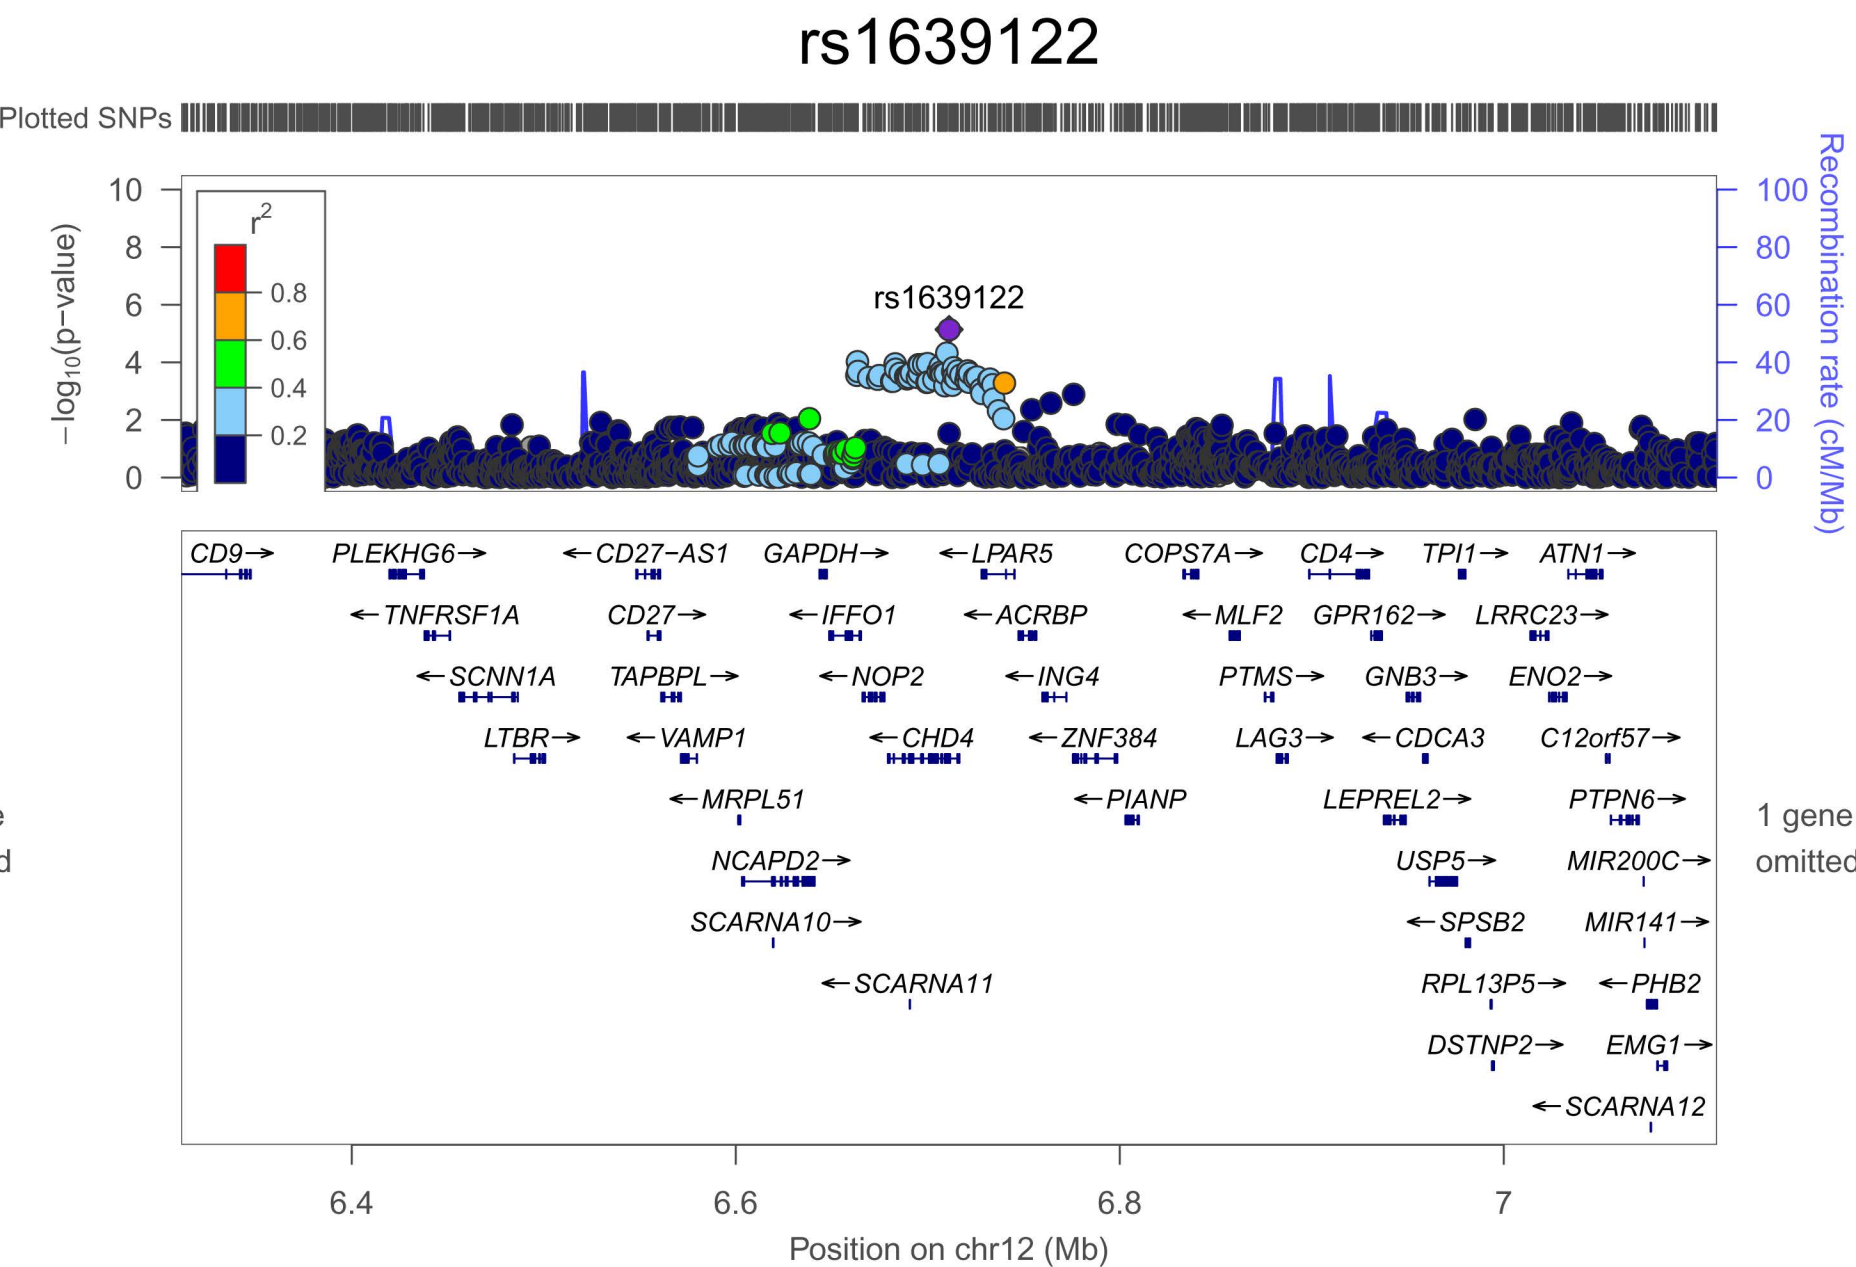



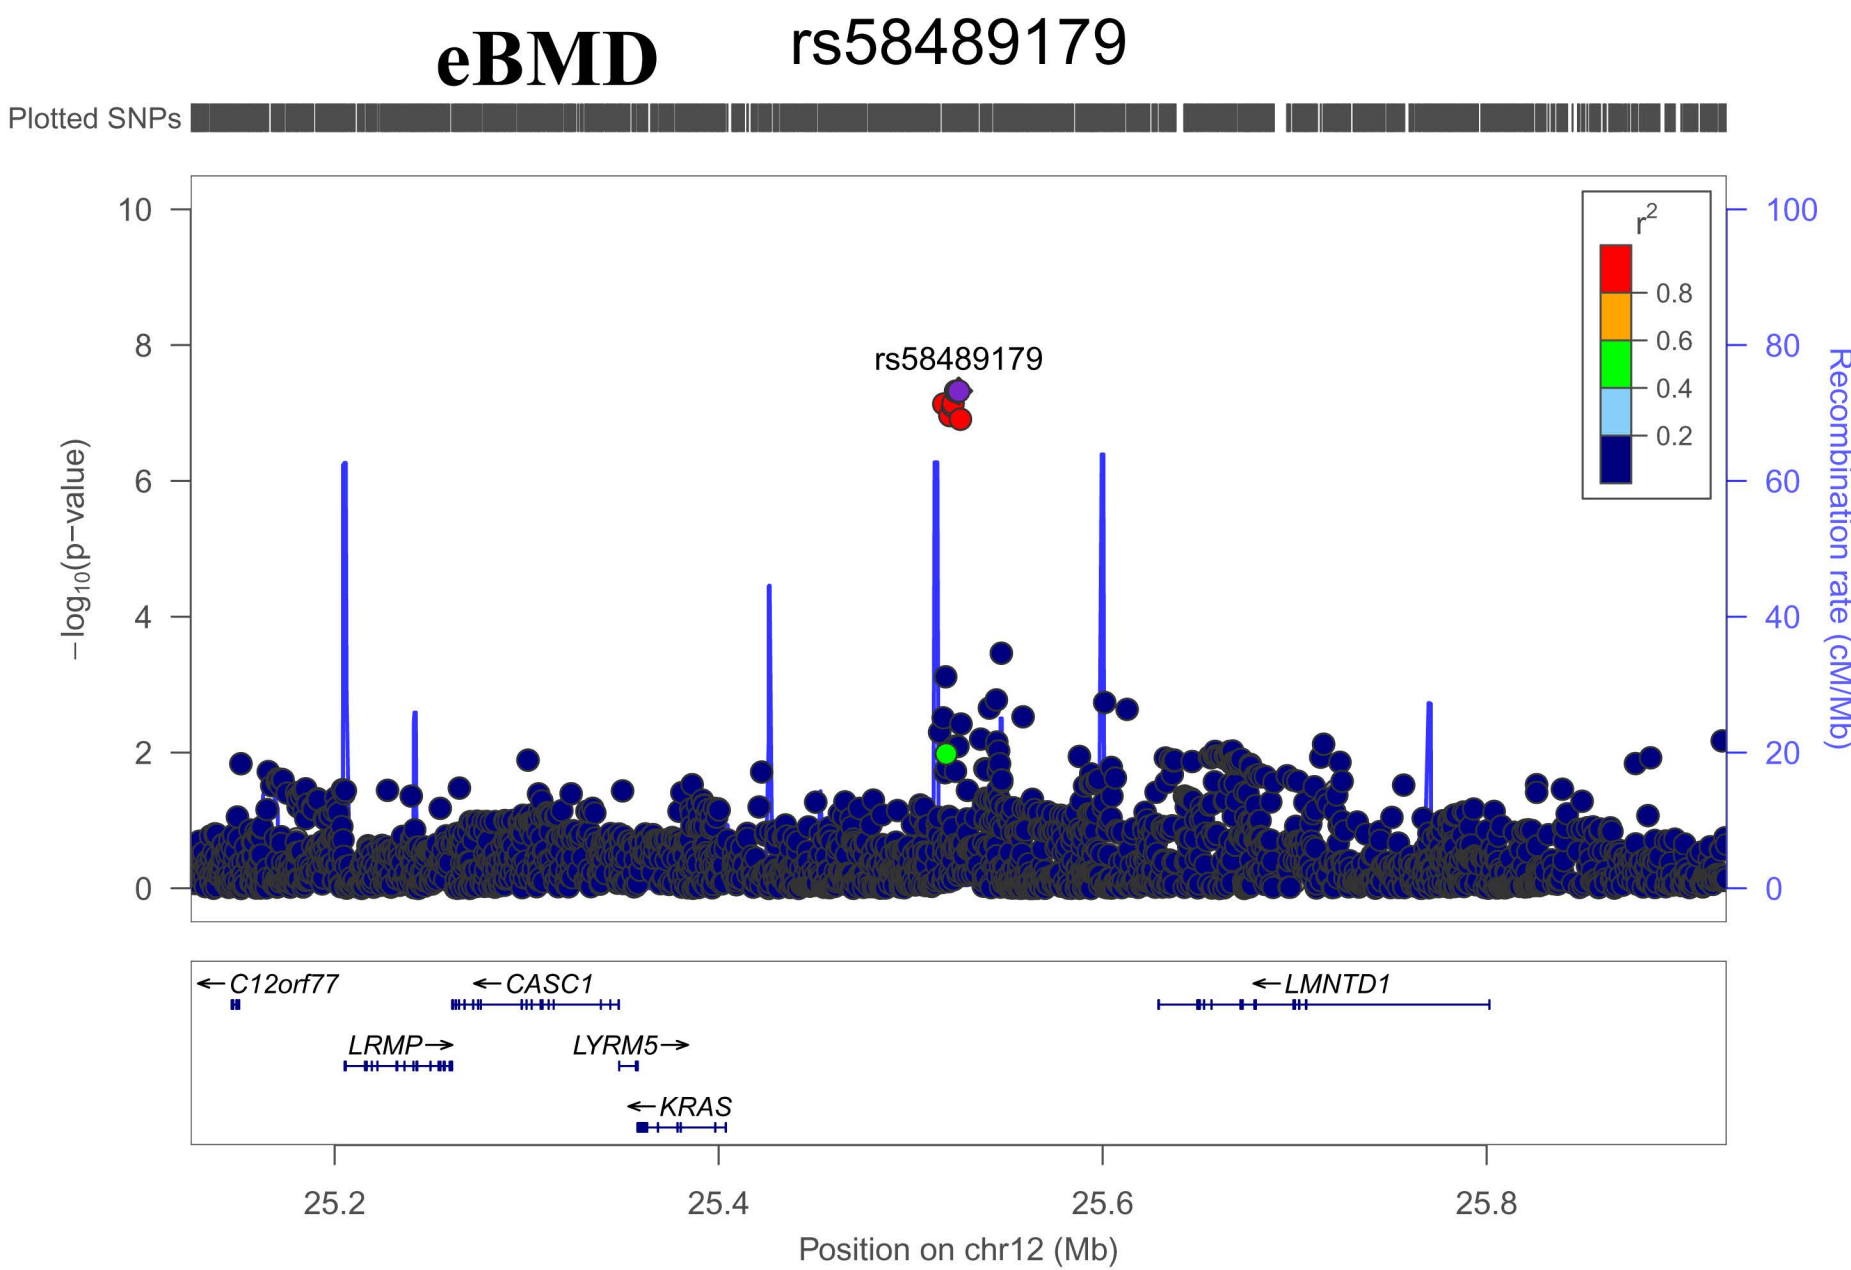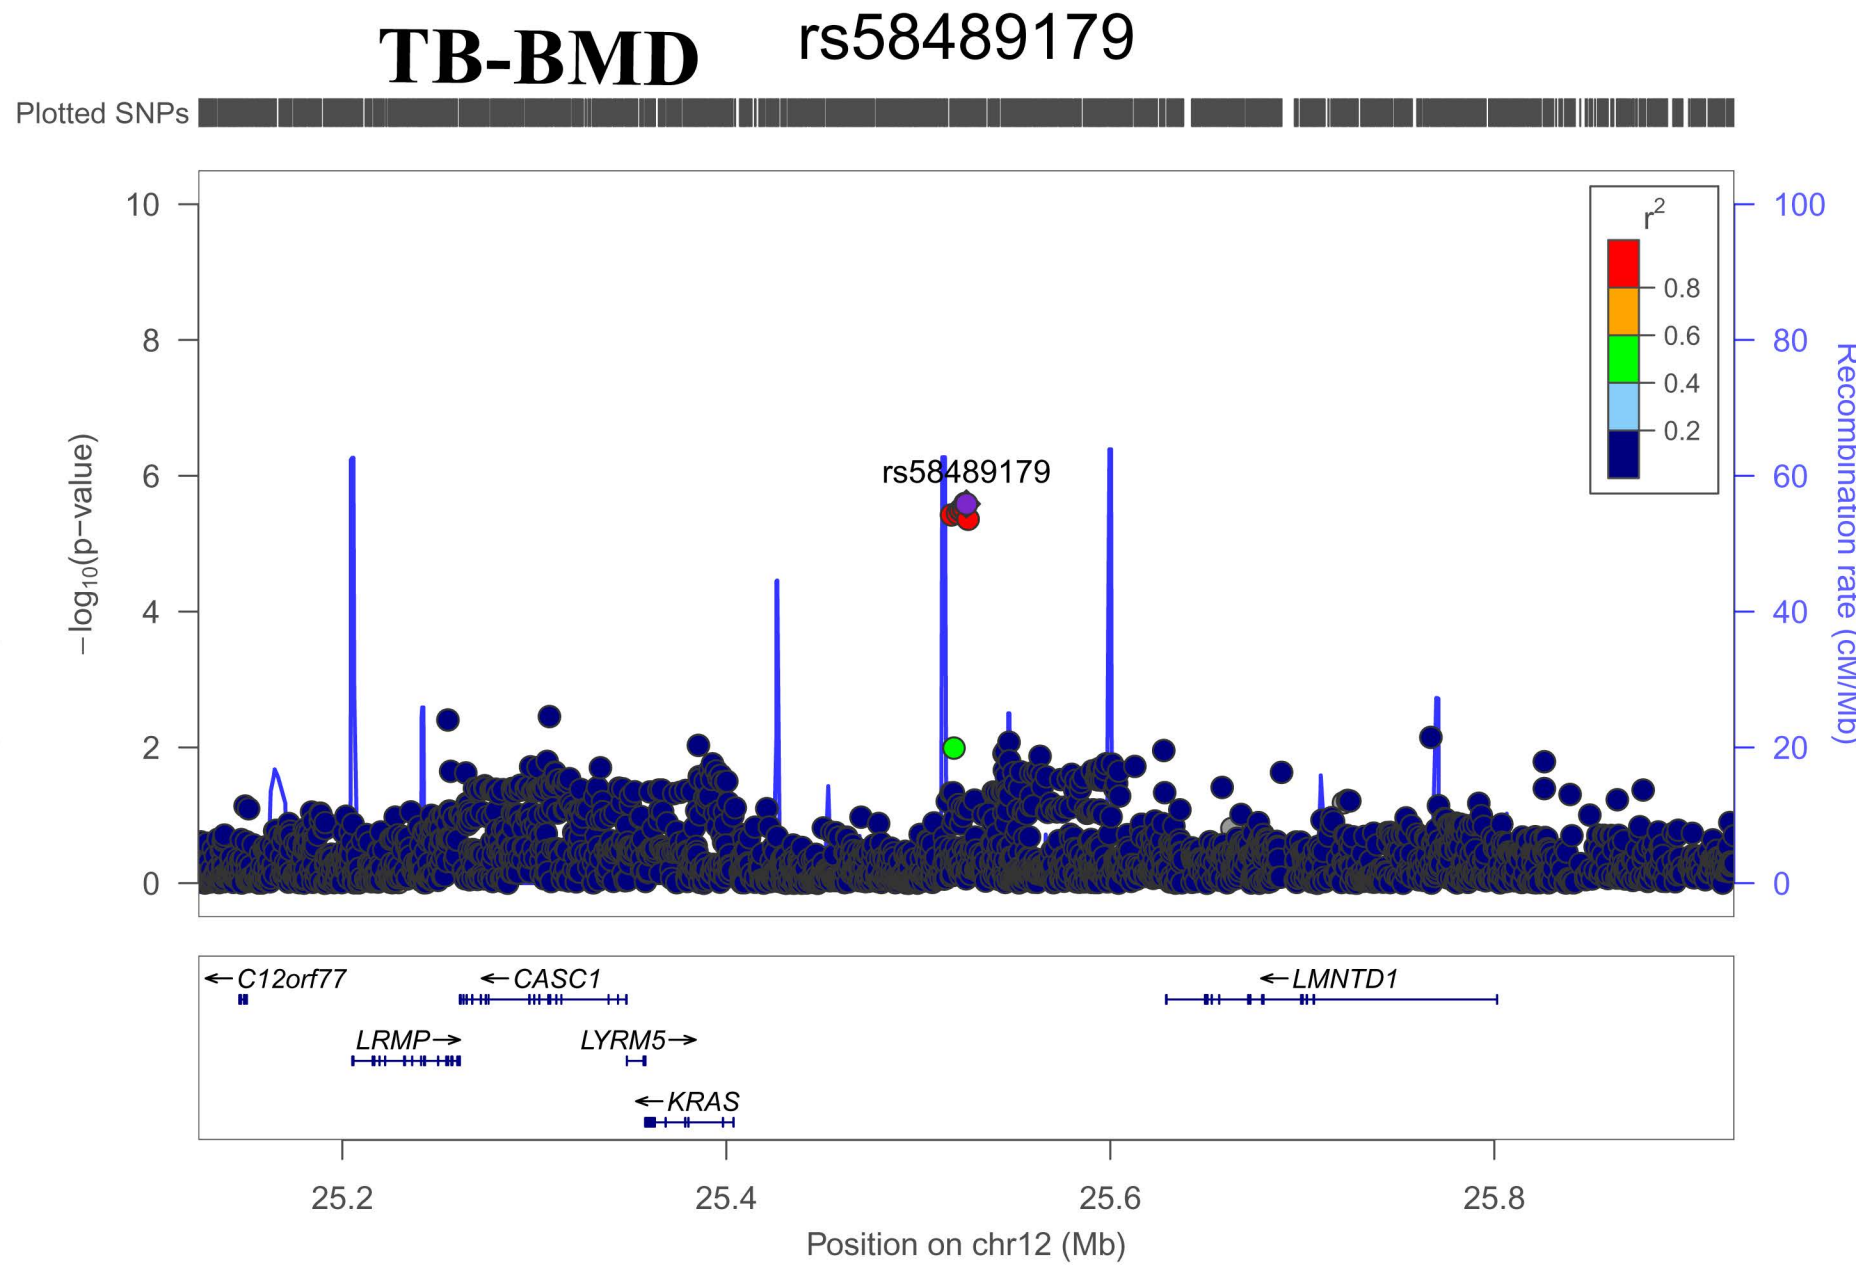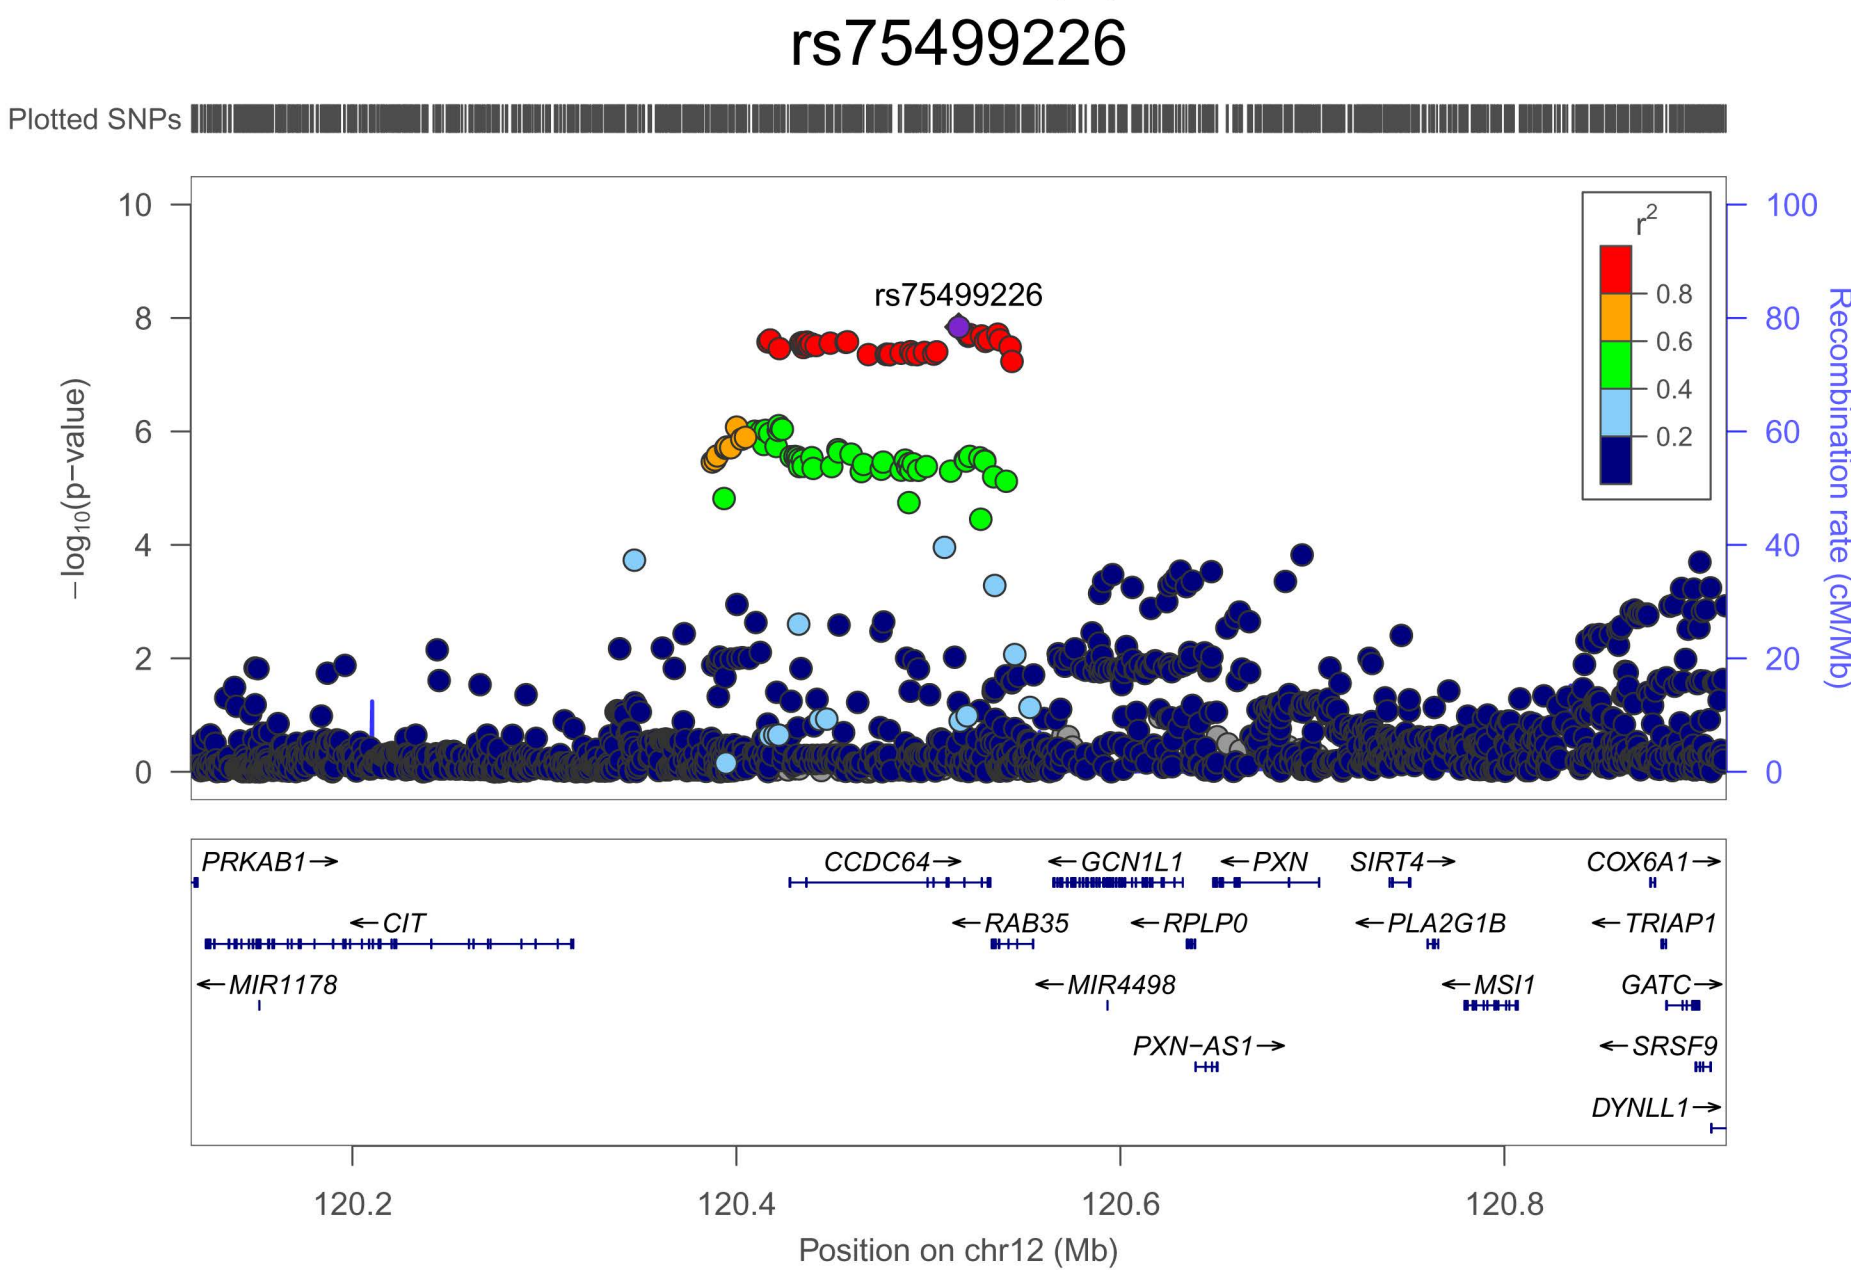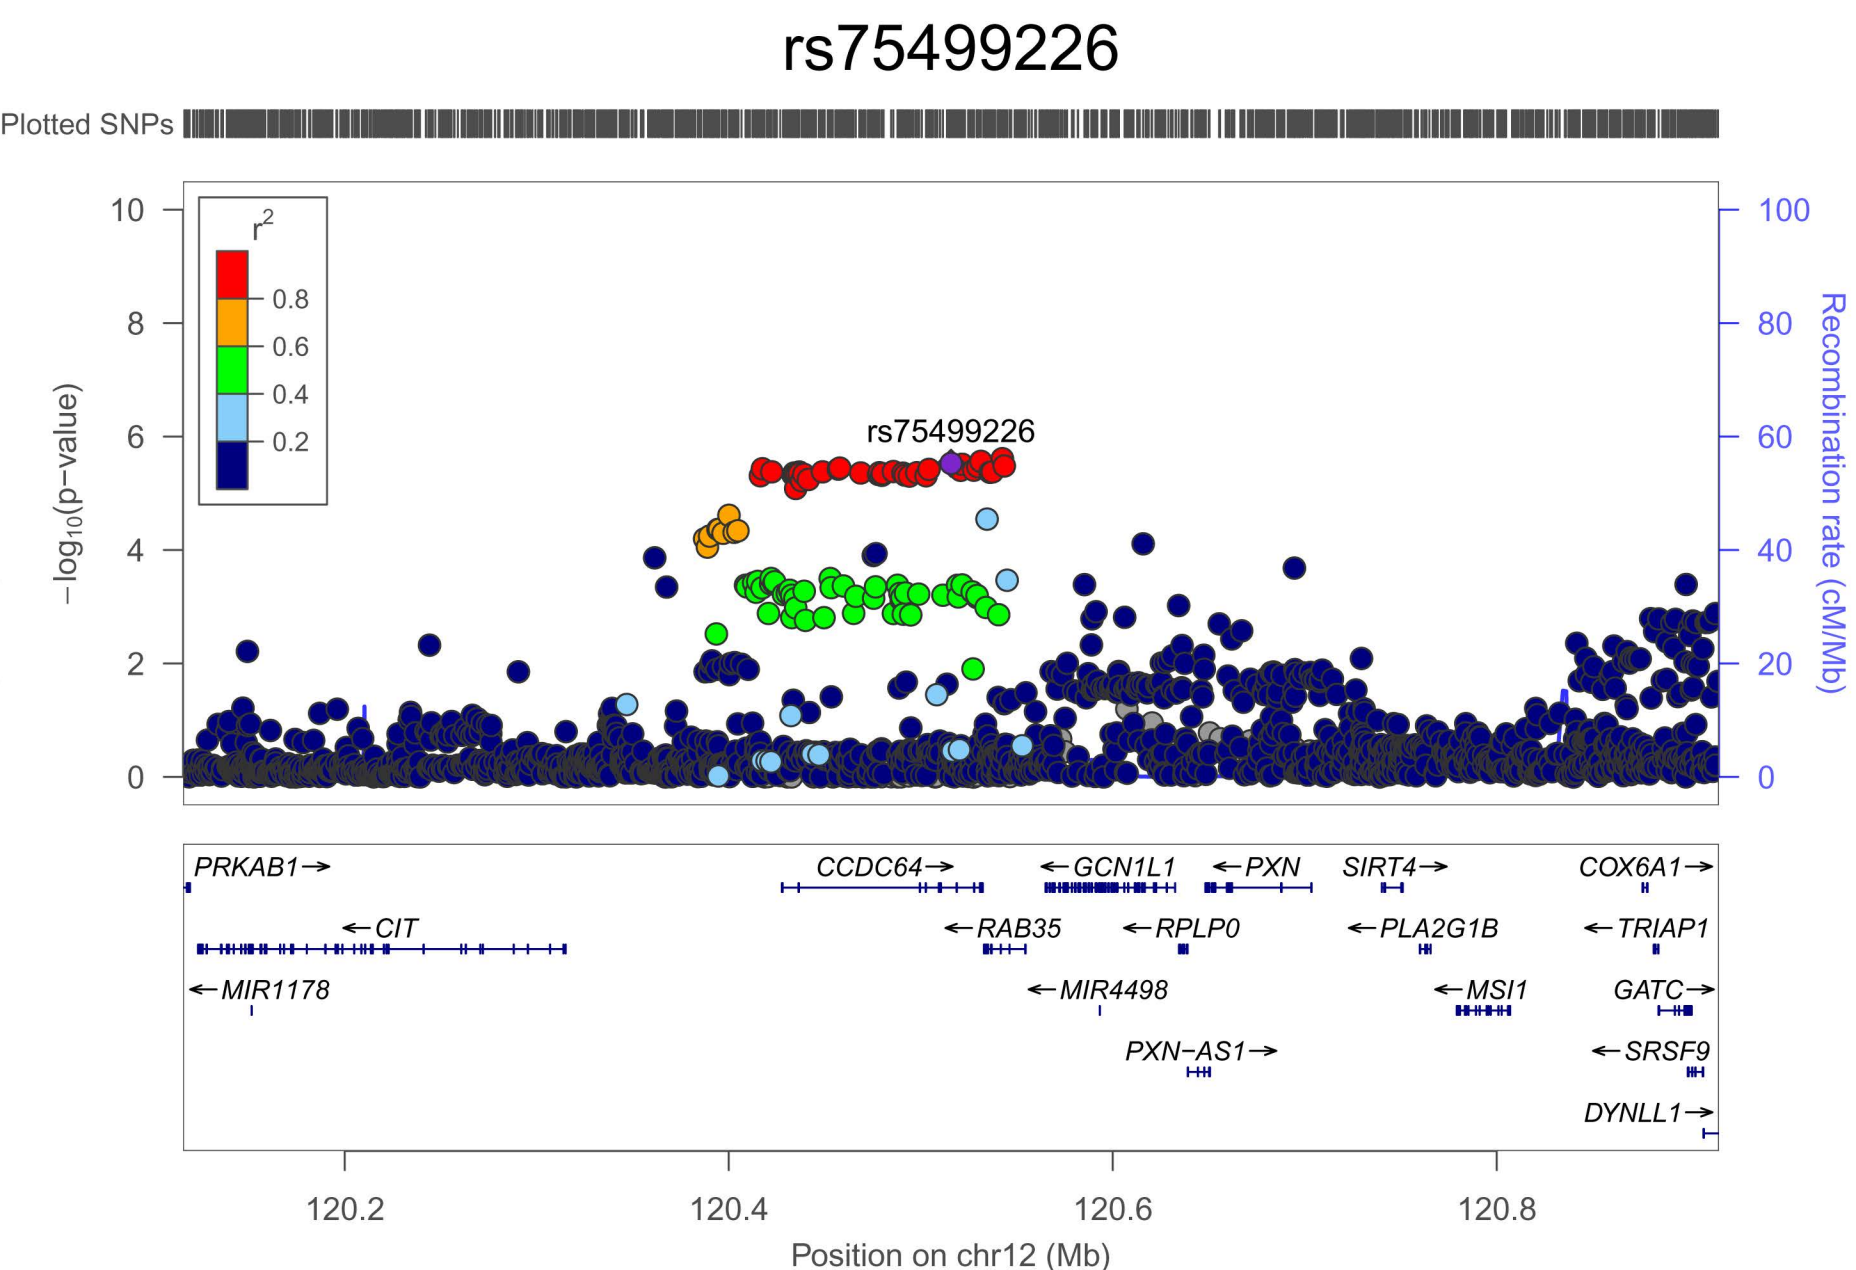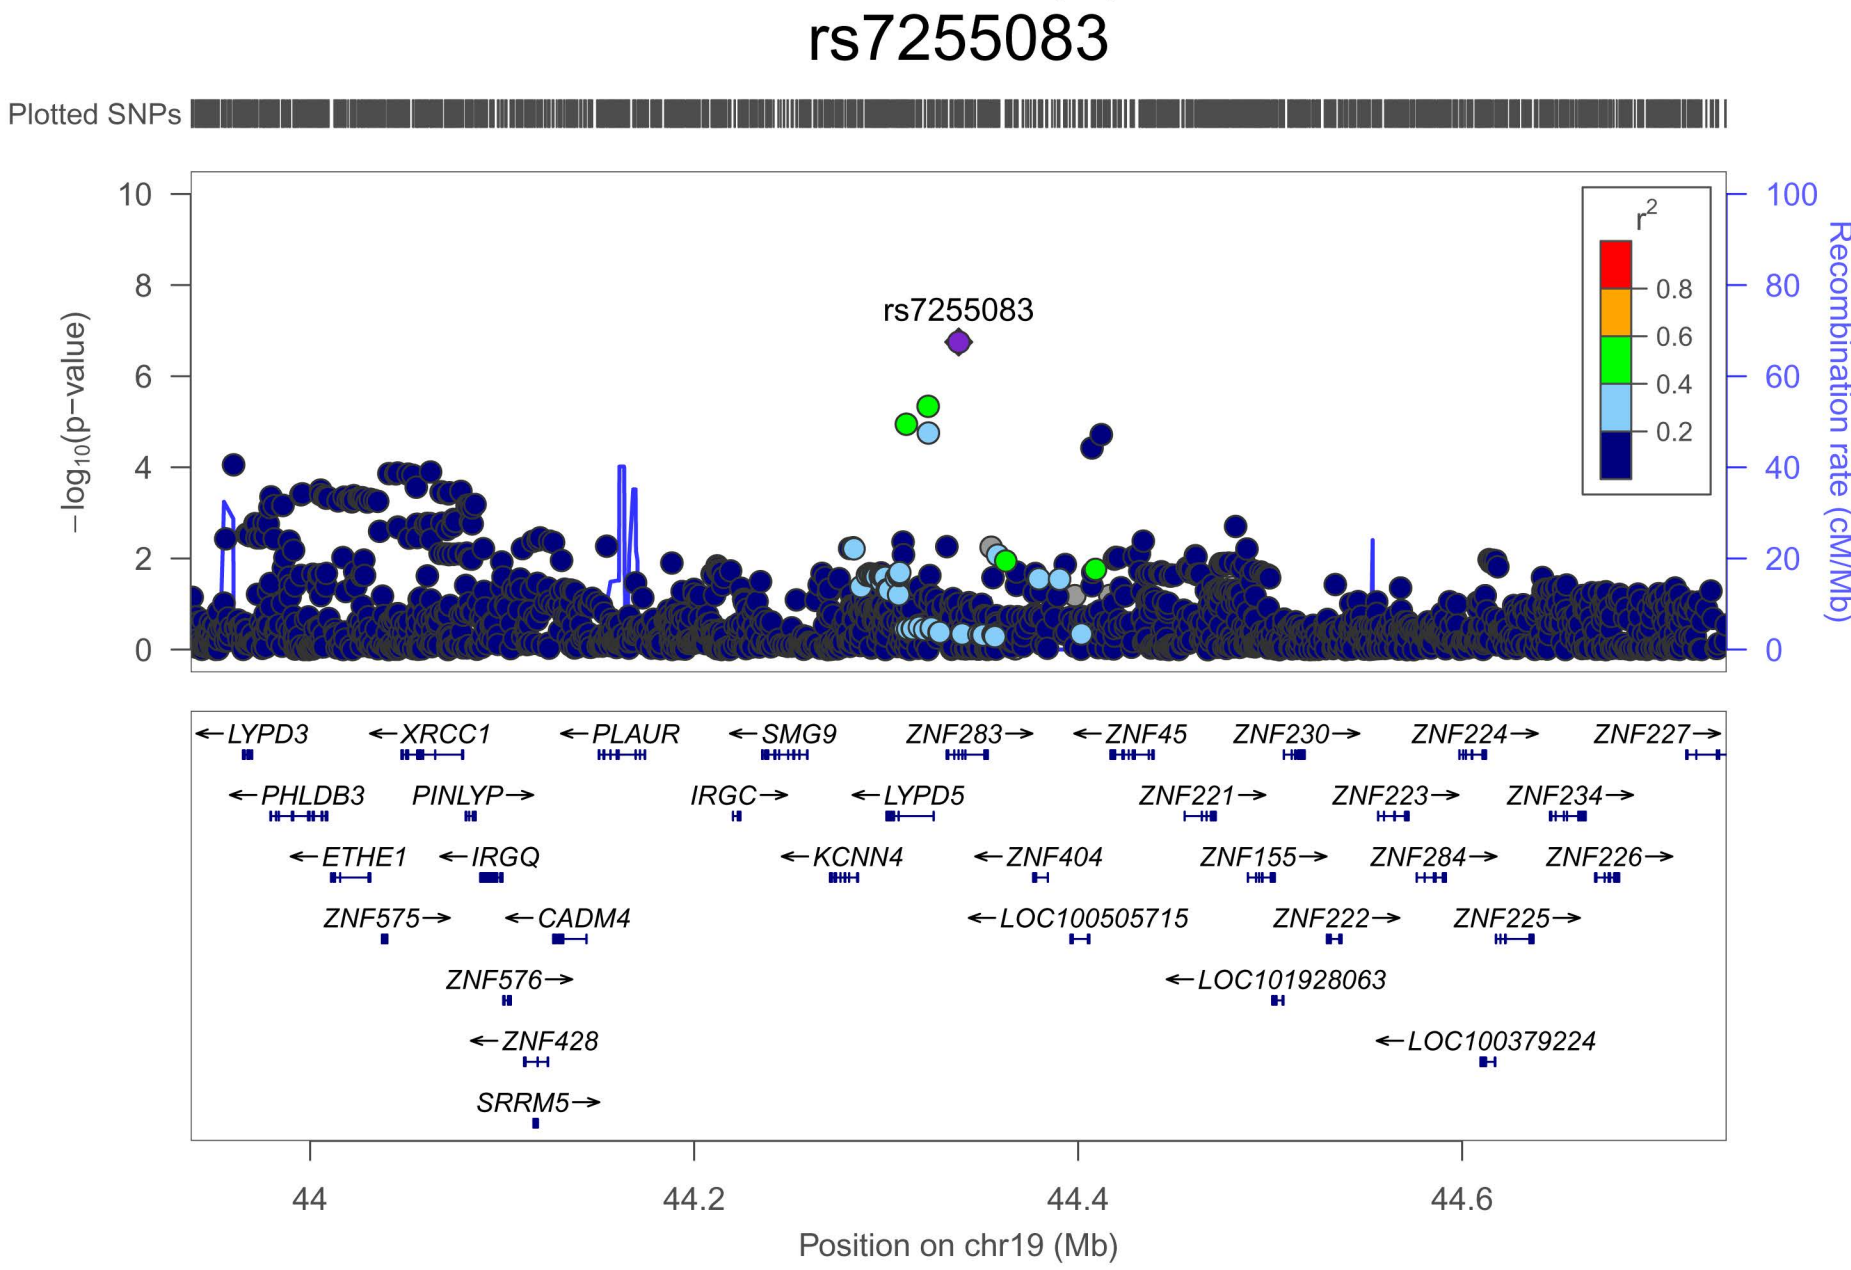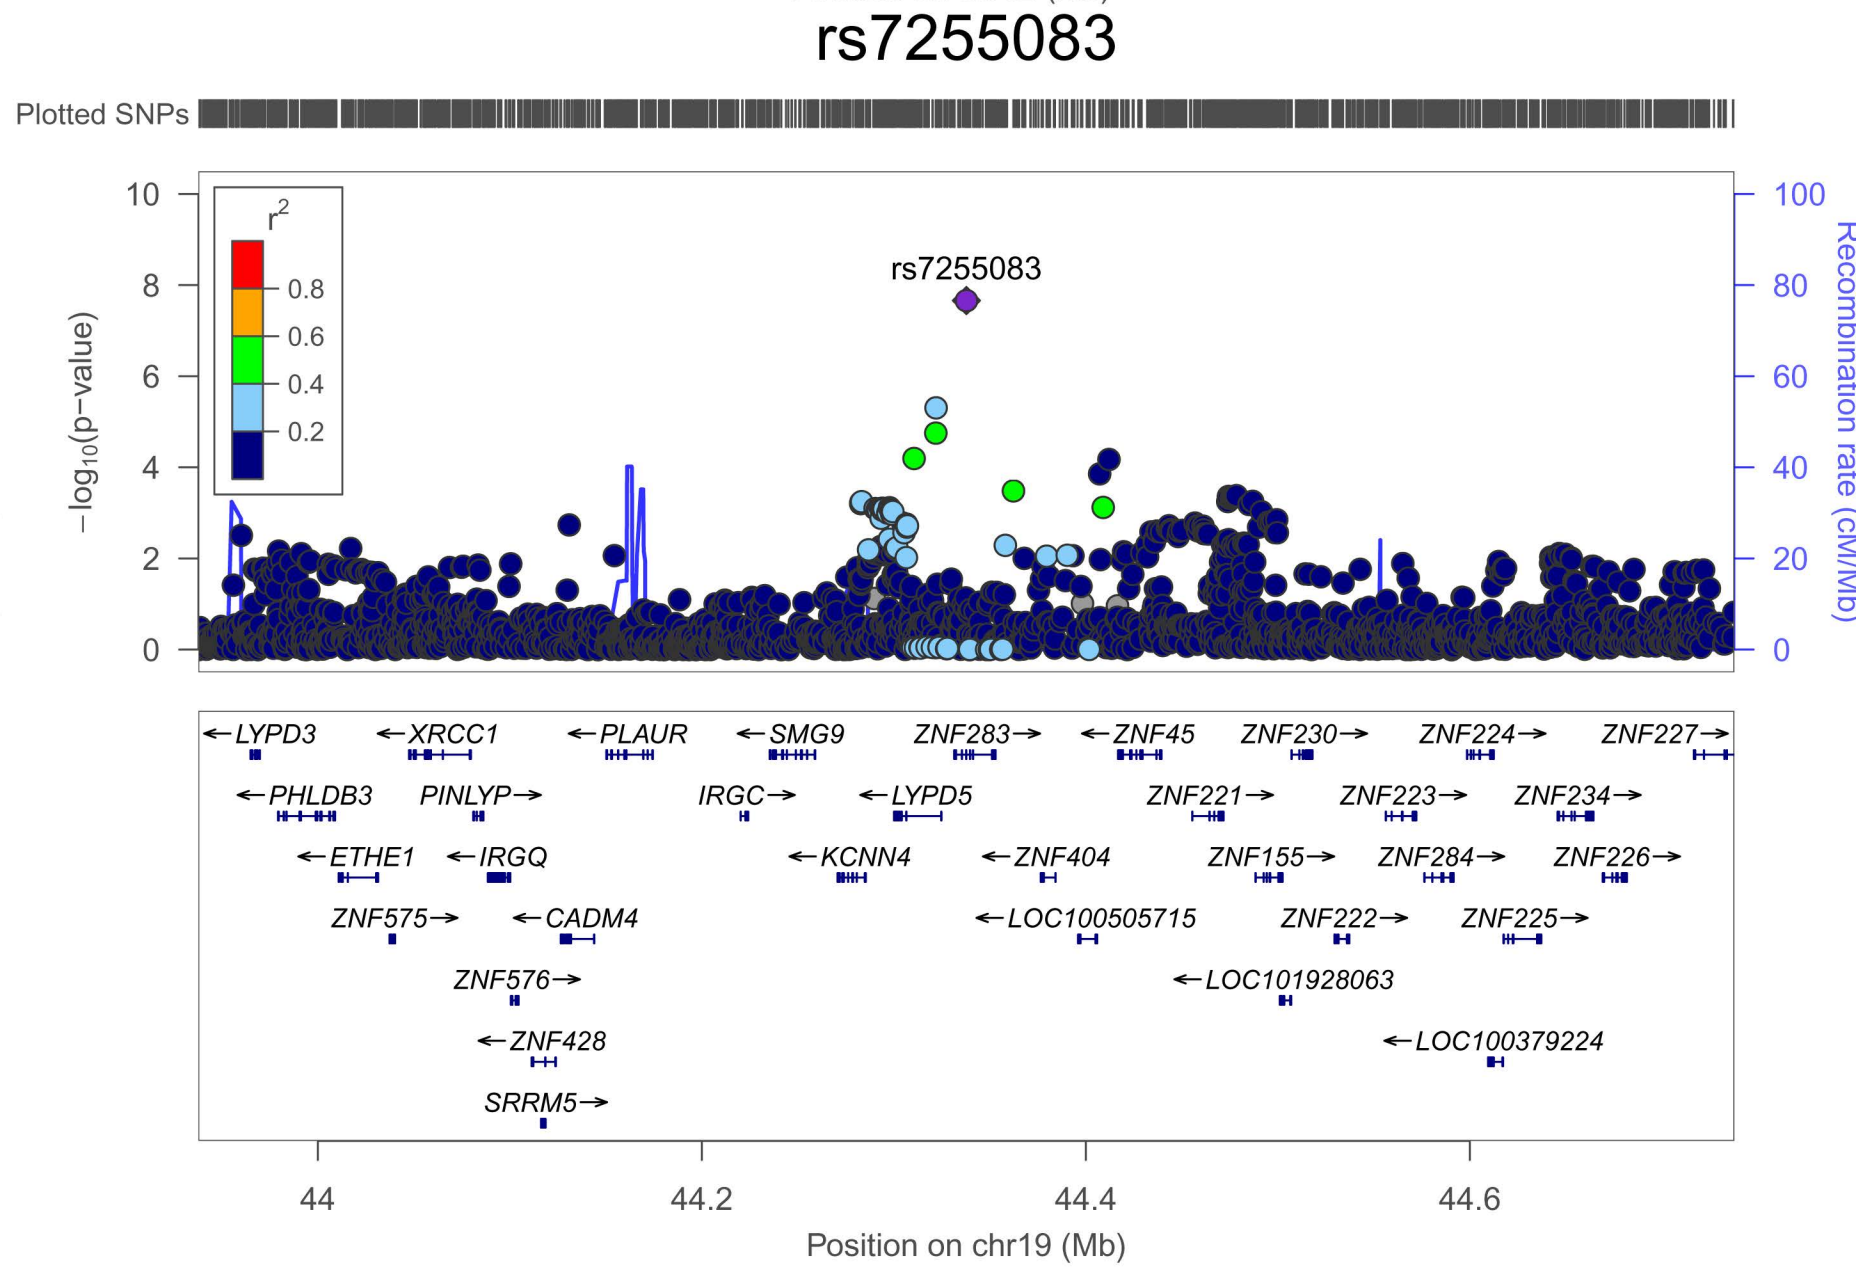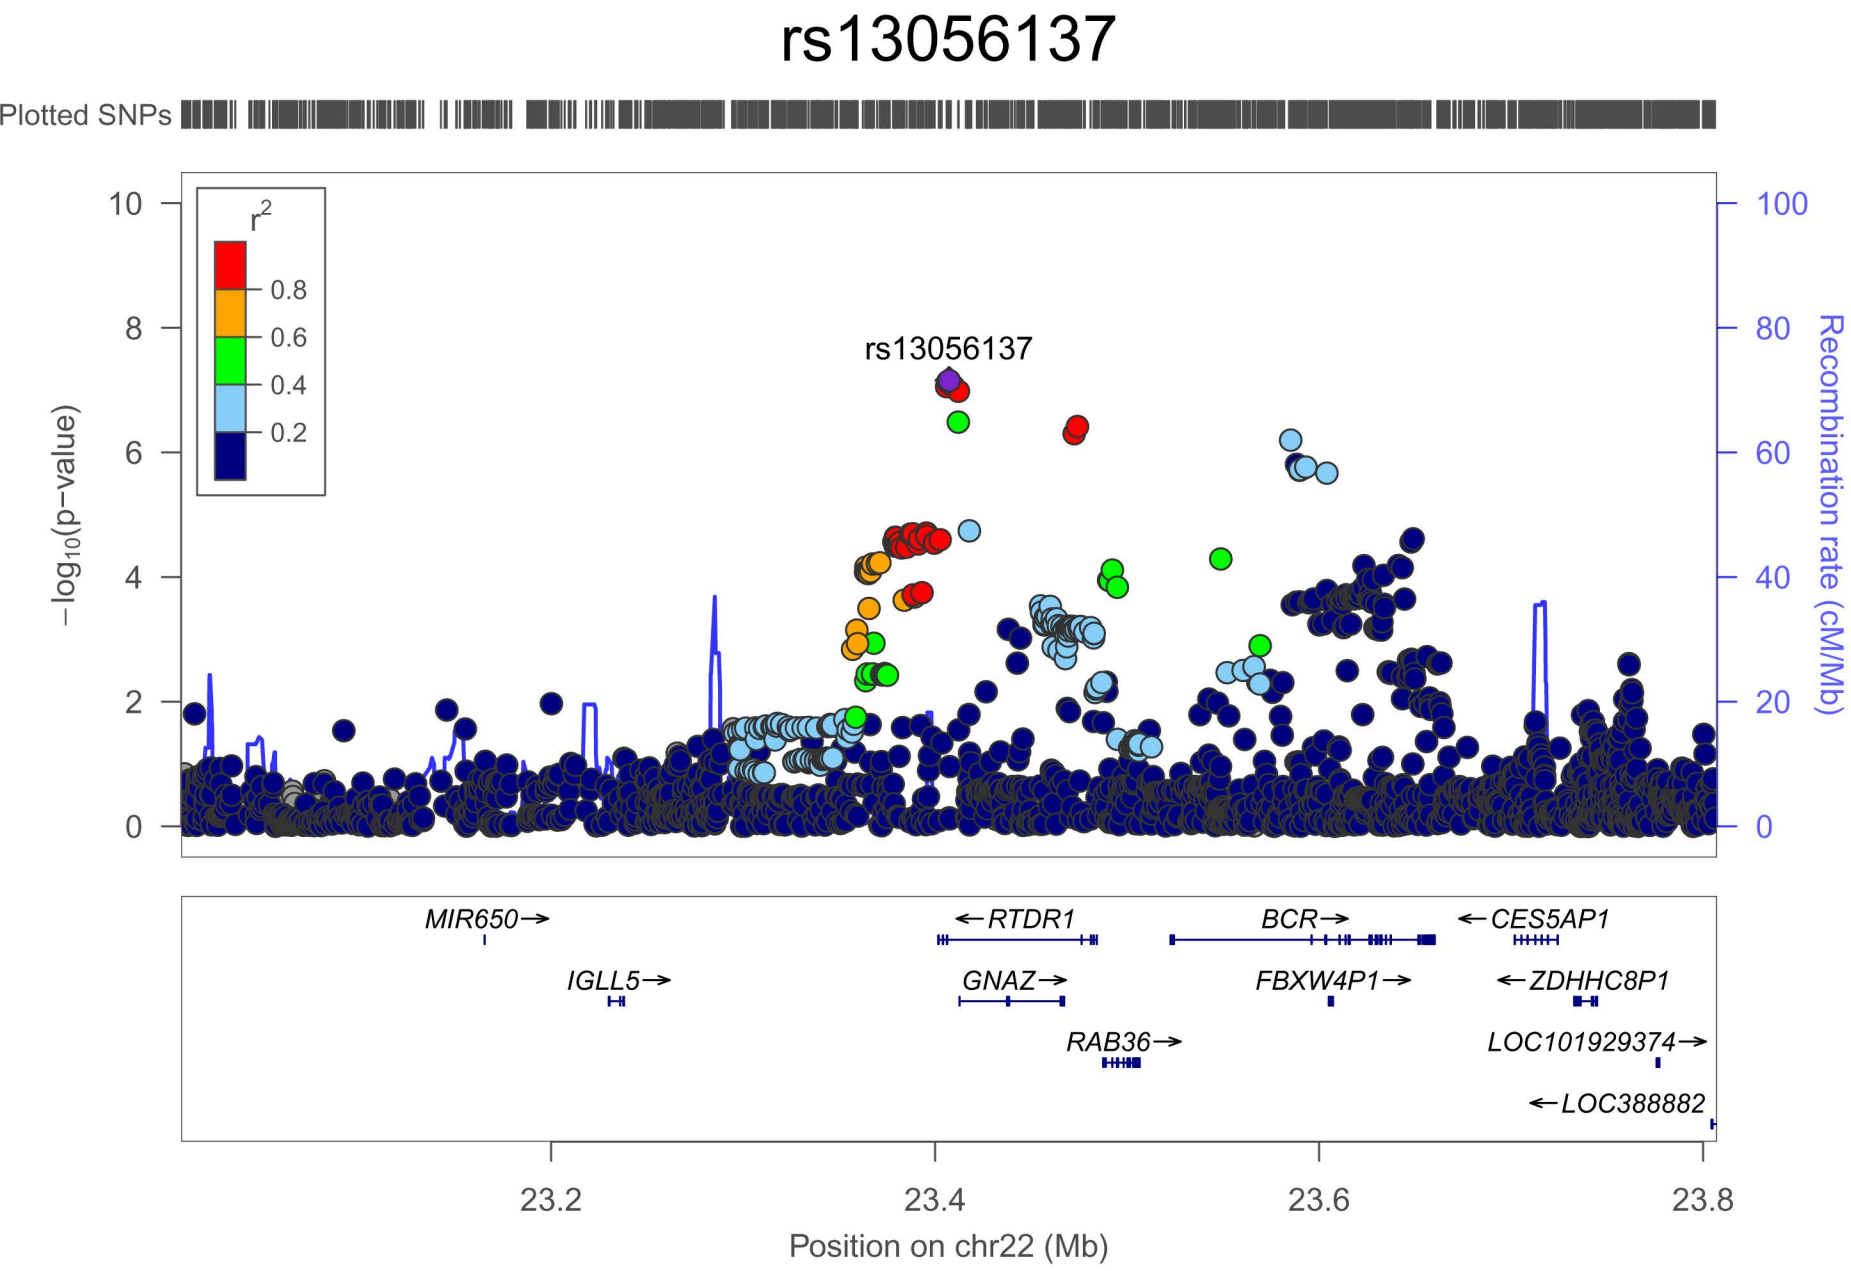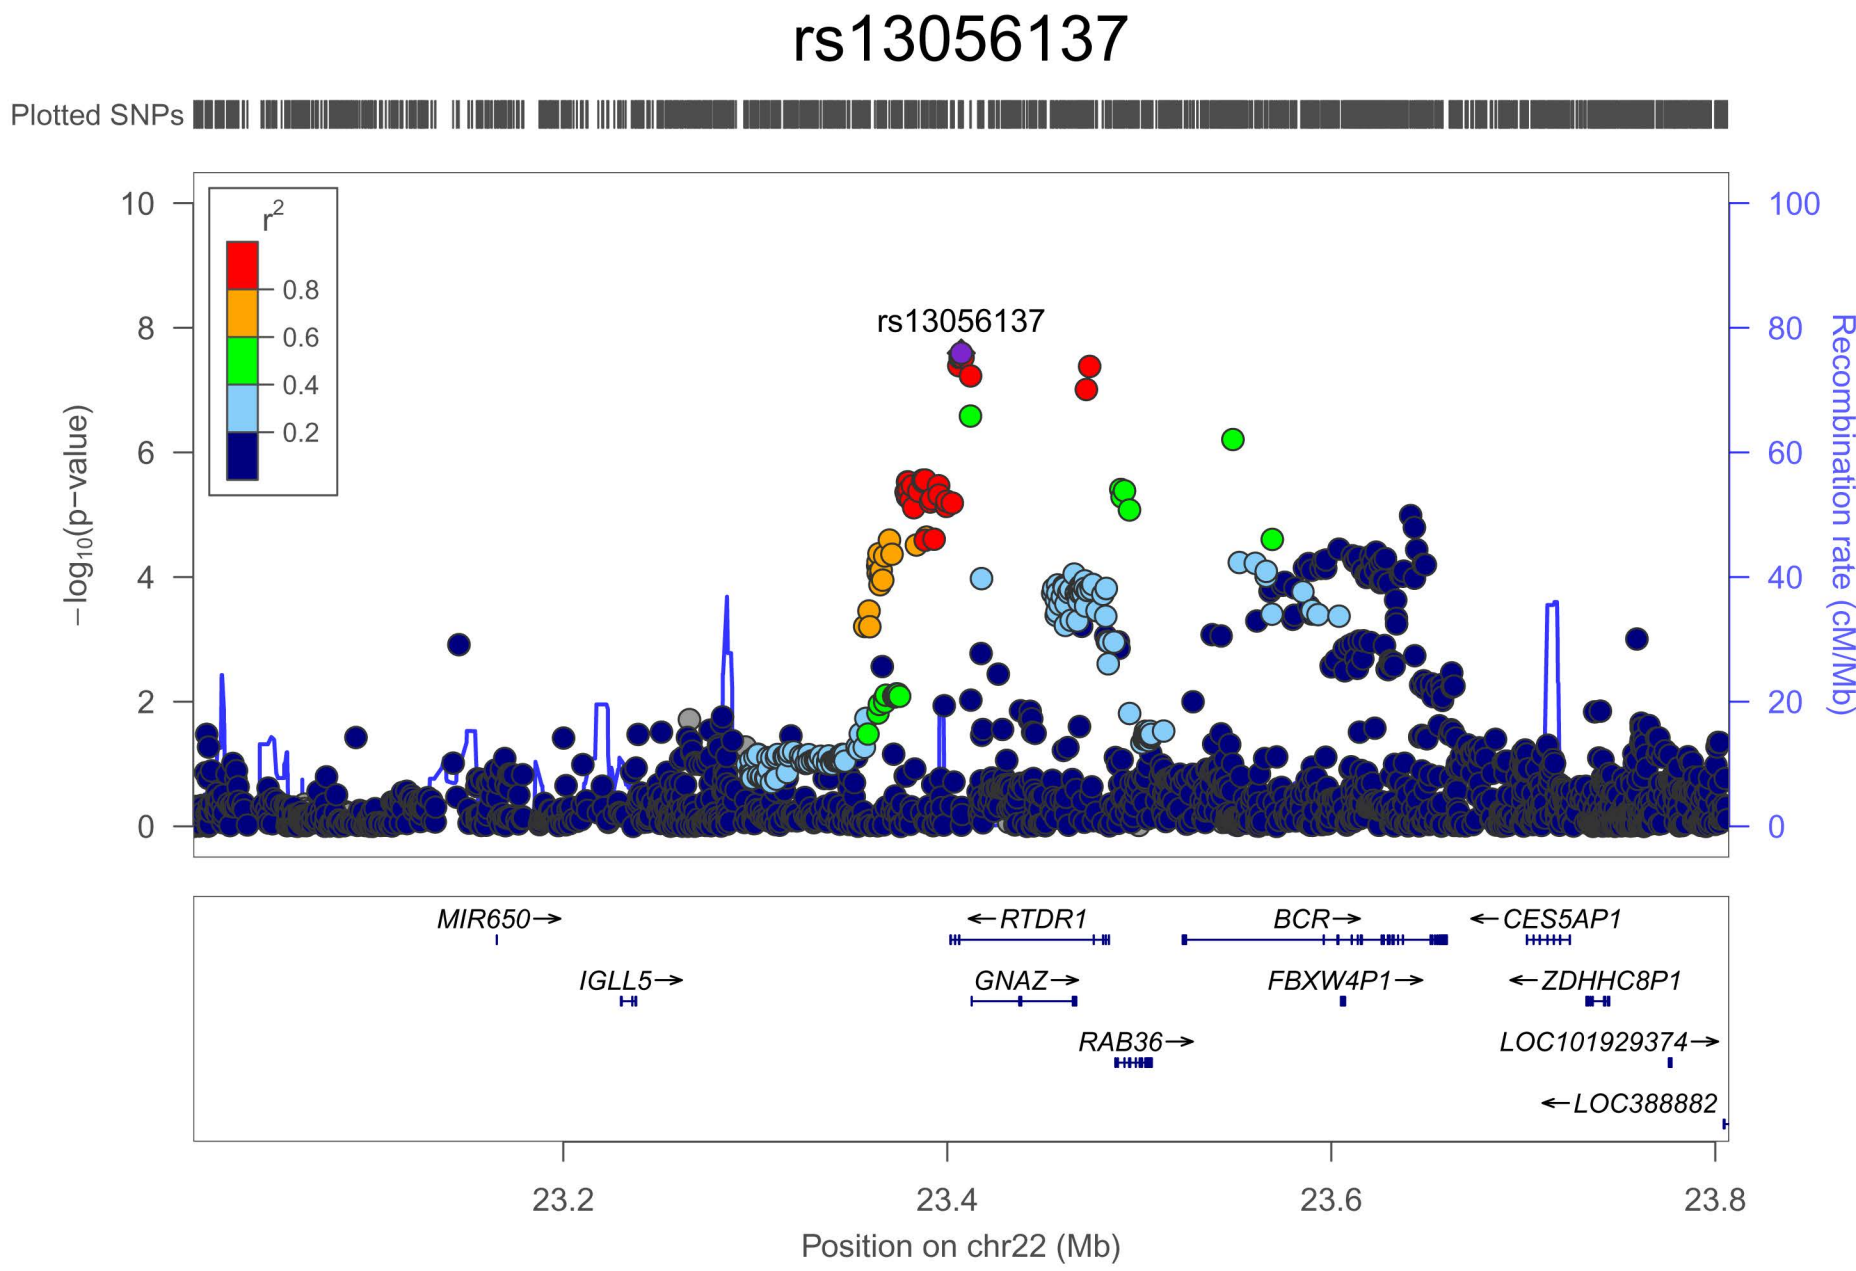

Supplement: Supplementary file [file 22383738]
